# Supplementary material for: Efficacy of low-magnitude high-frequency vibration (LMHFV) on musculoskeletal health of participants on wheelchair: a study protocol for a single-blinded randomised controlled study
Source: PubMed Central journal article supplement — BMJ Open. 2020 Dec 15;10(12):e038578. doi: 10.1136/bmjopen-2020-038578 (PMC7745337; doi:10.1136/bmjopen-2020-038578), 2020-12-15
Supplement: bmjopen-2020-038578.draft_revisions.pdf [file bmjopen-2020-038578.draft_revisions.pdf]

# BMJ Open

BMJ Open is committed to open peer review. As part of this commitment we make the peer review history of every article we publish publicly available.

When an article is published we post the peer reviewers' comments and the authors' responses online. We also post the versions of the paper that were used during peer review. These are the versions that the peer review comments apply to.

The versions of the paper that follow are the versions that were submitted during the peer review process. They are not the versions of record or the final published versions. They should not be cited or distributed as the published version of this manuscript.

BMJ Open is an open access journal and the full, final, typeset and author-corrected version of record of the manuscript is available on our site with no access controls, subscription charges or pay-per-view fees (<http://bmjopen.bmj.com>).

If you have any questions on BMJ Open's open peer review process please email [info.bmjopen@bmj.com](mailto:info.bmjopen@bmj.com)

# BMJ Open

## **Efficacy of Low-magnitude High-frequency Vibration (LMHFV) on Musculoskeletal Health of Subjects on Wheelchair: A Study Protocol for A Single-blinded Randomized Controlled Study**

|                               |                                                                                                                                                                                                                                                                                                                       |
|-------------------------------|-----------------------------------------------------------------------------------------------------------------------------------------------------------------------------------------------------------------------------------------------------------------------------------------------------------------------|
| Journal:                      | <i>BMJ Open</i>                                                                                                                                                                                                                                                                                                       |
| Manuscript ID                 | bmjopen-2020-038578                                                                                                                                                                                                                                                                                                   |
| Article Type:                 | Protocol                                                                                                                                                                                                                                                                                                              |
| Date Submitted by the Author: | 18-Mar-2020                                                                                                                                                                                                                                                                                                           |
| Complete List of Authors:     | Chow, Simon Kwoon Ho; Chinese University of Hong Kong, Ho, Chung Yan; Chinese University of Hong Kong Wong, Hiu Wun; Chinese University of Hong Kong Chim, Yu Ning; Chinese University of Hong Kong, Wong, Ronald Wong Man-Yeung ; Chinese University of Hong Kong Cheung, Wing Hoi; Chinese University of Hong Kong, |
| Keywords:                     | Musculoskeletal disorders < ORTHOPAEDIC & TRAUMA SURGERY, GERIATRIC MEDICINE, Bone diseases < ORTHOPAEDIC & TRAUMA SURGERY                                                                                                                                                                                            |
|                               |                                                                                                                                                                                                                                                                                                                       |

SCHOLARONE™  
Manuscripts

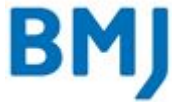

I, the Submitting Author has the right to grant and does grant on behalf of all authors of the Work (as defined in the below author licence), an exclusive licence and/or a non-exclusive licence for contributions from authors who are: i) UK Crown employees; ii) where BMJ has agreed a CC-BY licence shall apply, and/or iii) in accordance with the terms applicable for US Federal Government officers or employees acting as part of their official duties; on a worldwide, perpetual, irrevocable, royalty-free basis to BMJ Publishing Group Ltd ("BMJ") its licensees and where the relevant Journal is co-owned by BMJ to the co-owners of the Journal, to publish the Work in this journal and any other BMJ products and to exploit all rights, as set out in our [licence](#).

The Submitting Author accepts and understands that any supply made under these terms is made by BMJ to the Submitting Author unless you are acting as an employee on behalf of your employer or a postgraduate student of an affiliated institution which is paying any applicable article publishing charge ("APC") for Open Access articles. Where the Submitting Author wishes to make the Work available on an Open Access basis (and intends to pay the relevant APC), the terms of reuse of such Open Access shall be governed by a Creative Commons licence – details of these licences and which [Creative Commons](#) licence will apply to this Work are set out in our licence referred to above.

Other than as permitted in any relevant BMJ Author's Self Archiving Policies, I confirm this Work has not been accepted for publication elsewhere, is not being considered for publication elsewhere and does not duplicate material already published. I confirm all authors consent to publication of this Work and authorise the granting of this licence.

1  
2  
3 1 **Efficacy of Low-magnitude High-frequency Vibration (LMHFV) on Musculoskeletal Health**  
4  
5 2 **of Subjects on Wheelchair: A Study Protocol for A Single-blinded Randomized Controlled**  
6  
7 3 **Study**  
8  
9

10 4 Simon Kwoon-Ho Chow <sup>1,2</sup>, Chung Yan Ho <sup>1</sup>, Hiu Wun Wong<sup>1</sup>, Yu Ning Chim<sup>1</sup>, Ronald Man  
11  
12 5 Yeung Wong <sup>1</sup>, Wing Hoi Cheung <sup>1,2</sup>  
13  
14  
15  
16 6

17  
18  
19 7 **Author Affiliations**  
20  
21

22 8 <sup>1</sup> Department of Orthopaedics and Traumatology, Prince of Wales Hospital, The Chinese  
23  
24 9 University of Hong Kong, Hong Kong SAR, China.  
25  
26

27 10 <sup>2</sup> The CUHK-ACC Space Medicine Centre on Health Maintenance of Musculoskeletal System,  
28  
29 11 The Chinese University of Hong Kong Shenzhen Research Institute, Shenzhen, PR China.  
30  
31  
32  
33  
34  
35  
36  
37  
38  
39  
40  
41  
42  
43  
44  
45  
46

47  
48  
49  
50  
51  
52  
53  
54  
55  
56  
57  
58  
59  
60

16 **Correspondence to:**

17 Wing Hoi Cheung, PhD, Department of Orthopaedics and Traumatology, 5/F, Clinical Sciences  
18 Building, The Chinese University of Hong Kong, Shatin, New Territories, Hong Kong SAR, China.  
19 E-mail: [louischeung@cuhk.edu.hk](mailto:louischeung@cuhk.edu.hk); Telephone: (852) 3505-1559; Fax: (852) 3505-4618

## 1 **ABSTRACT**

### 2 **Introduction**

3 Low-magnitude high-frequency vibration (LMHFV) is a non-invasive biophysical intervention  
4 providing whole-body mechanical stimulation shown to benefit muscle strength, postural control,  
5 balancing ability, new bone formation, spinal bone mineral density (BMD), and blood circulation.  
6 Current LMHFV treatment requires elderlies to stand upright on the platform 20min/day, making  
7 it difficult for those with a poor musculoskeletal ability who cannot stand for long periods.  
8 Therefore, the vibration platform is modified to treat disabled patients at sitting position, which  
9 efficacy of LMHFV on this group of elderlies will be verified. It is hypothesized that the new  
10 design of LMHFV is beneficial to wheelchair users in terms of vertebral BMD, muscle health and  
11 musculoskeletal functions.

### 12 **Methods and analysis**

13 This is a single-blinded randomized controlled trial that investigates the effect of LMHFV on  
14 vertebral BMD, muscle health, balancing and functional ability in wheelchair users.

15 Healthy elderlies aged 65 years or above, with walking difficulties and using a wheelchair are  
16 eligible. Recruited subjects will be randomized to either LMHFV or control group. The primary  
17 outcome is to assess lumbar spine BMD by dual-energy X-ray absorptiometry (DXA) that is  
18 clinically recommended for osteoporosis diagnosis. All primary and secondary outcome  
19 assessments will be performed at baseline and 6 months post-treatment. Two-way repeated  
20 measures ANOVA will be used to compare measured outcomes between two groups at different  
21 time points.

### 22 **Ethics and dissemination**

1 The study protocol was approved by the Clinical Research Ethics Committee of the Chinese  
2 University of Hong Kong (Ref. no 2019.087-T). Results will be disseminated through peer-  
3 reviewed publications, conferences, and workshops.

#### 4 **Trial registration number**

5 ClinicalTrials.gov, NCT04180267.

#### 6 **Keywords**

7 Osteoporosis, Vibration Therapy, Wheelchair users, Vertebral BMD, LMHFV

#### 11 **Strengths and limitations of this study**

- 12 • This is the first study that investigates the efficacy of LMHFV on wheelchair users, hence  
13 data generated will be with high clinical translation values.
- 14 • This trial cannot be double-blinded since blinding subjects for the LMHFV treatment is not  
15 feasible.
- 16 • The vibration signals can be easily felt and placebo is rare in vibration studies.

## 1 INTRODUCTION

2 Ageing is an emerging socio-economic problem in Hong Kong. The ageing population at 65 or  
3 above increased continuously from 0.46 million (8.2%) to 1.27 million (17.9%) from 1988 to 2018  
4<sup>1</sup>. The prevalence of osteoporosis also increases due to the escalating ageing population<sup>2</sup>.  
5 Osteoporosis is an age-induced disorder with progressive loss of bone that leads to deterioration  
6 of bone microarchitecture and hence low BMD. It increases the risk of fragility fracture known to  
7 be associated with increased morbidity and mortality<sup>3</sup>.  
8 Elderly people with disability or mobility impairments due to trauma, chronic illnesses or over-  
9 weight may avoid walking and rely on wheelchairs for most daily activities. Many studies showed  
10 that wheelchair users had greater bone loss compared to walkers<sup>4 5</sup>. Physical activity is one of the  
11 recommended approaches for preventing osteoporosis. However, some elderly people may be  
12 restricted from exercise training because they are not physically fit to perform the intensive  
13 exercise<sup>6</sup>, leading to a vicious cycle of musculoskeletal deterioration.  
14 Low-magnitude high-frequency vibration (LMHFV) is a promising intervention proposed as an  
15 alternative to physical exercise<sup>7</sup> for treating osteoporosis. It is a non-invasive biophysical  
16 intervention that provides systemic vertical vibrations at 20 - 90Hz at amplitude of less than 1.0g  
17 (g = gravitational acceleration)<sup>8</sup>. Previous studies demonstrated that LMHFV treatment could  
18 enhance muscle strength<sup>9</sup>, postural control<sup>10</sup>, balancing ability<sup>6 11 12</sup>, new bone formation<sup>13-15</sup>,  
19 spinal BMD<sup>6</sup>, and blood circulation<sup>6</sup>.  
20 There were some studies reporting the effect of whole-body vibration treatment on wheelchair  
21 users with spinal cord injury. They showed that whole-body vibration treatment could increase  
22 upper limb performance during propulsion of the wheelchairs in terms of average speed and time

1 of displacement and blood flow to paralyzed muscles in the lower limbs<sup>16-18</sup>. However, there is a  
2 lack of evidence for the effect of LMHFV on elderly people with poor walking and standing ability  
3 (such as subjects on wheelchair), which is a missing gap of our knowledge.

4 In this study, we hypothesize that LMHFV would enhance the musculoskeletal health of the elderly  
5 people with walking difficulties and relying on wheelchairs for daily mobility, in terms of vertebral  
6 bone quality and muscle performance. The objective is to investigate the effects of LMHFV on  
7 vertebral BMD, muscle performance and balancing ability in disabled elderly subjects. The  
8 vibration platform will be modified to suit the disabled patients for treatment at sitting position.  
9 The results of this study would broaden the indications of vibration platform to benefit more people  
10 in the community, which have a good potential of translation.

## 12 **METHODS AND ANALYSIS**

### 13 *Study design*

14 This is a single-blinded randomized controlled trial to study the effects of LMHFV on vertebral  
15 BMD and muscle performance of disabled elderly. This is a two-year study, in which the recruited  
16 wheelchair users will receive a 6-month LMHFV treatment.

### 17 *Study participants*

18 Subjects will be recruited from the specialist outpatient clinic or orthopaedic wards of the Prince  
19 of Wales Hospital (PWH) of the Chinese University of Hong Kong, or community centers or  
20 elderly homes. Subjects will be recruited based on the inclusion and exclusion criteria. All



1 recruited subjects will be requested by an investigator to give a written consent and will perform  
2 the following assessments at the PWH.

### 3 *Inclusion criteria*

4 Inclusion criteria are listed as follows:

- 5 1. Subjects of both genders aged  $\geq 65$  years.
- 6 2. Subjects with walking difficulties, especially those who usually walk indoor but use  
7 wheelchairs outdoor.
- 8 3. Subjects with good general health conditions.

### 9 *Exclusion criteria*

10 Exclusion criteria are as follows:

- 11 1. Subjects cannot stand and walk independently.
- 12 2. Subjects who had vibration treatment before.
- 13 3. Subjects with malignancy.
- 14 4. Subjects with acute fractures or severe osteoarthritis<sup>19</sup>.
- 15 5. Subjects with cardiovascular concern such as with pace-maker in-situ.
- 16 6. Subjects with chronic inflammatory conditions known to affect muscle metabolism such as  
17 rheumatoid arthritis.
- 18 7. Subjects with high frequency of physical activities, such as subjects who participated in regular  
19 exercise five times a week or more.

### 20 *Randomization and grouping*

1 After baseline assessment, eligible subjects will be randomized by sealed-envelope drawing of  
2 computer-generated random numbers. The random number list is kept strictly confidential and the  
3 researchers will not have access to the list. They will be randomized into either one of two groups:  
4 LMHFV or control group.

### 5 *Assessments*

6 Two groups of subjects will be subjected to the same assessments: [1] demographic data collection;  
7 [2] BMD measurement at the spine (primary outcome) and hip; [3] handgrip strength; [4]  
8 quadriceps strength; [5] balancing ability test, [6] quality of life (QoL); and [6] adverse event  
9 reporting, if any. The compliance of the subjects in LMHFV group will be recorded in a SD card  
10 in the machine; meanwhile the subjects will be given a calendar to self-record the usage for  
11 counter-checking. A flow diagram of the whole trial is shown in Figure 1.

### 12 *Interventions*

13 After baseline visit, regular phone reminders will be used to remind subjects to complete their  
14 LMHFV interventions and about the date of their end-point assessments. Contacts will be  
15 provided for any queries during the study.

16 LMHFV is a non-invasive biophysical intervention providing whole-body vibration signals for  
17 mechanical stimulation. Subjects are required to sit upright on the vibration platform (V-Health  
18 Limited, Hong Kong) providing a frequency 35 Hz, 0.3× gravitational acceleration at peak-to-peak  
19 displacement of less than 0.1 mm for 20 min/day. Treatment will be given for at least 3 days/week.  
20 In this study, the design of vibration platforms is modified for wheelchair users. A chair and a  
21 supporting footrest are fixed on the platform (Figure 2). Subjects are instructed to sit on the chair  
22 and rest their feet on the footrest for 20 min/day. The research staff will instruct safety precautions

1 and operative procedures. Each patient in the control group will remain in their habitual life style  
2 without vibration treatment.

### 3 *Blinding*

4 Investigators, outcome assessors and the statistician will be blinded to the grouping allocation that  
5 is performed by one independent staff and kept confidential from team members. Outcome  
6 assessments will be performed by a central technician at the Bone Quality and Health Centre of  
7 the Chinese University of Hong Kong, who has obtained International Society for Clinical  
8 Densitometry (ISCD) certificate and is independent from this project. All subjects will be  
9 reminded not to disclose their grouping to the assessors. However, blinding the subjects for the  
10 LMHFV treatment is not feasible because the vibration signals can be easily felt and placebo is  
11 rare in vibration studies<sup>6 11</sup>.

### 12 *Primary outcome measures*

13 All primary and secondary outcome assessments for the two groups will be performed at baseline  
14 and 6 months post-treatment.

15 The primary outcome of this study is vertebral BMD. BMD will be assessed by standard DXA  
16 (Delphi W, Hologic, Waltham, MA, USA) which is a gold standard assessment for osteoporosis  
17 recommended by World Health Organization (WHO). Spine and hip are the two standard sites for  
18 the diagnosis of osteoporosis and both will be measured. The only ethical concern is the additional  
19 DXA assessments, which emits a low-dose radiation at 10 microSv, roughly equivalent to 1 day  
20 exposure to natural background radiation. In our institute, the short-term precision error of areal  
21 BMD (aBMD) by DXA was 2.07% at the femoral neck and 1.35%<sup>20</sup> at the lumbar spine.

### 22 *Secondary outcome measures*

1  
2  
3 1 Secondary outcomes include muscle strength assessment, balancing ability and quality of life  
4  
5 2 (QoL).  
6  
7

8 3 Handgrip strength and quadriceps strength will be assessed. Handgrip strength will be measured  
9  
10 4 by dynamometer (5030JI, JAMAR, USA) on dominant hand of each subject. Participants will be  
11  
12 5 instructed to hold the device with the arm at right angle and elbow to the side of the body. The  
13  
14 6 maximum effort will be taken from 3 trials<sup>21</sup>. Quadriceps strength will be measured by instructing  
15  
16 7 the subjects to perform an active extension of the knee joint at a sitting position with both feet free  
17  
18 8 from the ground, and the hip and knee joint flexed at 90°. The peak forces of the knee extension  
19  
20 9 will be measured by a dynamometer attached at the malleoli level and repeated thrice in each lower  
21  
22 10 limb with the maximum force taken for analysis<sup>6</sup>.  
23  
24  
25

26  
27 11 To assess the balancing ability, modified functional reach test<sup>22</sup> and postural stability test will be  
28  
29 12 performed. Modified functional reach test is a simple test for fall risk assessment<sup>23</sup>. It measures  
30  
31 13 the maximal distance that the subject can reach when the subjects sits on a bench with their hip,  
32  
33 14 knees, and ankles positioned at 90° of flexion, with feet positioned flat on the floor. A level  
34  
35 15 yardstick will be mounted on the wall at the height of each subject's acromion of the non-paretic  
36  
37 16 side, while sitting on bench with no back or arm rests. Subjects are required to lean as far as  
38  
39 17 possible in each direction without rotating or touching the wall. The furthest position of the fifth  
40  
41 18 finger will be marked on the yardstick. If the subject cannot raise the paretic arm, the distance  
42  
43 19 covered by the acromion during leaning will be used<sup>19</sup>. Postural stability test measures subjects'  
44  
45 20 ability to maintain their center of balance. Center of pressure (COP) is the average point at which  
46  
47 21 the body concentrates. COP can be tested by Biodex Balance System (Biodex Medical Systems,  
48  
49 22 Inc, NY, USA). Subjects are required to sit on the platform without support from feet and keep  
50  
51  
52  
53  
54  
55  
56  
57  
58  
59  
60

1 arms folded across chest. Thighs need to be kept parallel, with 75% of their length supported on  
2 the platform<sup>24</sup>.

3 To assess the health-related quality of life, validated Chinese version of the 36-item Short-Form  
4 Health Survey (SF-36) will be used for quantitative evaluation of the subjects' physical and mental  
5 component summary. Subjects with higher scores indicate a general better quality of life<sup>6 25</sup>.

### 6 *Recruitment Strategy*

7 Subjects will be recruited for this RCT through two approaches: 1) Promotional and educational  
8 talks at community centres; 2) Collaboration with social workers from each collaborating  
9 community centre.

10 Before recruitment, they will be informed of the potential benefits and risks of the interventions in  
11 this study. They will then be required to fill out an informed consent and can withdraw from this  
12 study without any condition.

### 13 *Sample size calculation*

14 Vertebral BMD is used as the primary outcome in this study. Our previous bedrest study<sup>26</sup> showed  
15 that vibration could reduce the loss of bone mineral density at various skeletal sites by 5-10%. The  
16 total sample size is estimated to be 70 subjects using two-way repeated measures ANOVA with  
17 power at 0.8 and alpha of 0.05. With consideration of around 15% dropout, the sample size is  
18 increased to n=80.

### 19 *Data analysis*

1 Two-way repeated measures ANOVA will be used for comparing the measured outcomes between  
2 two groups at different time points. SPSS version 25.0 (IBM, NY, USA) will be used to perform  
3 analysis and significance level is set at  $p < 0.05$ .

#### 4 *Data monitoring*

5 All investigators will be responsible for record keeping. Only principle and co-investigators,  
6 authorized research personnel and Ethical Committee can access to the personal data during and  
7 after the study. All data collection will be performed with strict adherence to the professional  
8 standards of confidentiality. Any personal information, including subjects' name, address, phone  
9 number etc., will be removed from all records. Important documents will be retained for at least 3  
10 years after the completion of the study for final report and inspection.

#### 11 *Data Statement*

12 Data and resources will be shared with other eligible investigators through academically  
13 established means. The protocol and datasets used or analysed in this study will be available from  
14 the corresponding author upon reasonable request. Researchers who provide a methodologically  
15 sound proposal may access data to achieve aims in the approved proposal.

#### 16 *Patient and public involvement*

17 Patients and the public were not involved in the design or planning of the study. Members of the  
18 public are involved in the recruitment of participants or conduct of the study. We will report test  
19 results to participants in plain language after their end-point assessments are completed. Results  
20 will be available to the public and patients in the forms of educational talks and booklets or flyers  
21 and published in open access peer-reviewed journals.

1  
2  
3 1 *Ethics and dissemination*  
4  
5

6 2 The study protocol has been approved by the Clinical Research Ethics Committee of the Chinese  
7  
8 3 University of Hong Kong (Ref. no 2019.087-T). Trial results will be published in peer-reviewed  
9  
10 4 journals and disseminated at relevant conferences and to the public via educational talks and  
11  
12 5 booklets or flyers.  
13  
14  
15  
16  
17  
18

19 7 **DISCUSSION**  
20  
21

22 8 To our knowledge, this is the first study to investigate the efficacy of low-magnitude high-  
23  
24 9 frequency vibration therapy (LMHFV) on wheelchair users. As the worldwide ageing population  
25  
26 10 escalates, the number of people with mobility impairment or disability would also increase<sup>27</sup>.  
27  
28 11 These people would inevitably be relying on wheelchair to assist their daily living<sup>28</sup>. Wheelchair-  
29  
30 12 bound elderlies usually have limited physical activity and is therefore associated to lower BMD<sup>29</sup>  
31  
32 13 and ability to control body position, and thus have an increased risk of fall and osteoporotic  
33  
34 14 fractures. A study from Grant Medical Center in the United States investigated 30 wheelchair-  
35  
36 15 bound subjects who fell from wheelchair over a 5 years period<sup>30</sup>. The report showed that elderlies  
37  
38 16 who were older than 65 years of age with higher fall risk were associated with lack of physical  
39  
40 17 activity and poor nutrition, leading to a decrease in muscle mass and strength. As most  
41  
42 18 osteoporotic fractures are caused by combination of poor balance, falls, and deteriorating bone  
43  
44 19 strength. Therefore, LMHFV is the proposed strategy to target musculoskeletal deterioration in  
45  
46 20 wheelchair users for the prevention of more detrimental consequences.  
47  
48  
49  
50  
51

52 21 LMHFV has previously been reported to have positive effects on reducing fall and fracture risks,  
53  
54 22 enhancing muscle strength and improving balancing ability in healthy community-dwelling older  
55  
56  
57

1 people<sup>6 31</sup>. Supported with this evidence, it is therefore hypothesized that LMHFV would provide  
2 positive effects on the musculoskeletal health and physical performance in terms of BMD, muscle  
3 strength, balancing ability on elderlies with disability or mobility impairments who rely on  
4 wheelchairs for locomotion.

5 Vibration is a good treatment modality that is easy to implement for physically challenged patients,  
6 like wheelchair users. However, there is a scarce of literature reporting its effect on this group of  
7 patients who are most desperately in need of the treatment. There have been a few reports on the  
8 application of vibration treatment on wheelchair users with spinal cord injury (SCI). Menéndez's  
9 study reported in 2016 investigated the acute effect of whole-body vibration<sup>18</sup>. Ten patients with  
10 SCI were recruited and treated with various treatment schemes including the whole-body vibration  
11 (WBV). Patients were instructed to sit on wheelchairs with their feet rested on the vibration  
12 platform (Galileo Home, Galileo, Novotec, Germany, 10 Hz, 5 mm peak-to-peak). Their results  
13 have shown an enhancement to the mean blood velocity (MBV) and peak blood velocity (PBV)  
14 by approximately 25% at 7 minutes after a 1-minute vibration treatment. A separate study in 2016,  
15 also by Menéndez's group, investigated the long-term combined treatment effect of WBV and  
16 electromyostimulatin (ES) in SCI patients. Seventeen subjects with SCI were randomized into  
17 treatment group and control group for 12 weeks. Patients in treatment group received 30 sections  
18 of 10-minute WBV and ES stimulation over a 12-week period<sup>17</sup>. The treatment group was reported  
19 to show increased resting arterial diameter, increased blood flow, and increased muscle thickness  
20 at the gastrocnemius after 12 weeks of treatment. Although these studies employed a side-  
21 alternating vibration (instead of vertical-oscillating vibration) only to the lower limbs, these results  
22 suggested that mechanical stimulation in the form of vibration could provide benefits to blood flow  
23 that is associated with better performance-related outcomes in paralyzed skeletal muscles.



1  
2  
3 1 Therefore, suggesting that the proposed LMHFV treatment, providing a vertical oscillating  
4  
5 2 stimulation (Figure 1B) to the whole-body would be beneficial to the target group of patients.  
6  
7

8 3 Findings of the current clinical trial would generate valuable data that is of high clinical translation  
9  
10 4 values for wider application of vibration therapy in the community; and to generate clinical  
11  
12 5 evidence that is not restricted to the healthy and mobile older people, but also to the group of  
13  
14 6 patients with mobility impairments and high risk of further musculoskeletal function deterioration.  
15  
16

### 17 7 **TRIAL STATUS**

18  
19  
20 8 This trial is in process of planning subject recruitment.  
21  
22

### 23 9 **ACKNOWLEDGEMENTS**

24  
25  
26 10 We would like to thank all the colleagues in the Fall Prevention Team and the Bone Quality and  
27  
28 11 Health Centre of the Department of Orthopaedics and Traumatology, Faculty of Medicine, The  
29  
30 12 Chinese University of Hong Kong for their support and help in this work and all the subjects for  
31  
32 13 their participation in this study.  
33  
34  
35

### 36 14 **FUNDING**

37  
38  
39 15 This study was supported by Project Impact Enhancement Fund (Ref: PIEF/U3/01) and Evidence-  
40  
41 16 Based Orthopaedics Clinical Education and Research Program (EBO) of the Chinese University  
42  
43 17 of Hong Kong; V-health Limited for lending and modifications the vibration platforms used for  
44  
45 18 this study.  
46  
47  
48

### 49 19 **AUTHOR CONTRIBUTIONS**

50  
51  
52 20 All the authors designed the study and composed the manuscript. All authors read and approved  
53  
54 21 the final manuscript.  
55  
56  
57

## 1 **ETHICS APPROVAL**

2 The study protocol was approved by the Clinical Research Ethics Committee of the Chinese  
3 University of Hong Kong (Ref. no 2019.087-T) and conformed to the Declaration of Helsinki.  
4 Results will be disseminated through peer-reviewed publications, conferences and workshops.

## 5 **CONSENT FOR PUBLICATION**

6 Not applicable.

## 7 **COMPETING INTERESTS**

8 The authors declare no conflict of interest.

## 9 **ABBREVIATIONS**

- 10 Low-magnitude high-frequency vibration (LMHFV)  
11 Bone mineral density (BMD)  
12 Areal BMD (aBMD)  
13 X-ray absorptiometry (DXA)  
14 Quality of life (QoL)  
15 International Society for Clinical Densitometry (ISCD)  
16 World Health Organization (WHO)  
17 Center of pressure (COP)  
18 36-item Short-Form Health Survey (SF-36)  
19 Spinal cord injury (SCI)  
20 Whole-body vibration (WBV)  
21 Mean blood velocity (MBV)  
22 Peak blood velocity (PBV)  
23 Electromyostimulatin (ES)

1  
2  
3 **1 REFERENCES**  
4  
5

- 6 2 1. Wong RMY, Choy MHV, Li MCM, et al. A systematic review of current osteoporotic  
7 3 metaphyseal fracture animal models. *Bone Joint Res* 2018;7(1):6-11. doi: 10.1302/2046-  
8 4 3758.71.BJR-2016-0334.R2 [published Online First: 2018/01/07]
- 9 5 2. Cole HA, Ohba T, Nyman JS, et al. Fibrin accumulation secondary to loss of plasmin-mediated  
10 6 fibrinolysis drives inflammatory osteoporosis in mice. *Arthritis Rheumatol*  
11 7 2014;66(8):2222-33. doi: 10.1002/art.38639 [published Online First: 2014/03/26]
- 12 8 3. Chung SL, Leung KS, Cheung WH. Low-magnitude high-frequency vibration enhances gene  
13 9 expression related to callus formation, mineralization and remodeling during osteoporotic  
14 10 fracture healing in rats. *Journal of orthopaedic research : official publication of the*  
15 11 *Orthopaedic Research Society* 2014;32(12):1572-9. doi: 10.1002/jor.22715 [published  
16 12 Online First: 2014/08/19]
- 17 13 4. Gebara OC, Mittleman MA, Sutherland P, et al. Association between increased estrogen status  
18 14 and increased fibrinolytic potential in the Framingham Offspring Study. *Circulation*  
19 15 1995;91(7):1952-8. doi: 10.1161/01.cir.91.7.1952 [published Online First: 1995/04/01]
- 20 16 5. Lindoff C, Petersson F, Lecander I, et al. Passage of the menopause is followed by haemostatic  
21 17 changes. *Maturitas* 1993;17(1):17-22. doi: 10.1016/0378-5122(93)90119-3 [published  
22 18 Online First: 1993/07/01]
- 23 19 6. Leung KS, Li CY, Tse YK, et al. Effects of 18-month low-magnitude high-frequency vibration  
24 20 on fall rate and fracture risks in 710 community elderly--a cluster-randomized controlled  
25 21 trial. *Osteoporosis international : a journal established as result of cooperation between*  
26 22 *the European Foundation for Osteoporosis and the National Osteoporosis Foundation of*  
27 23 *the USA* 2014;25(6):1785-95. doi: 10.1007/s00198-014-2693-6 [published Online First:  
28 24 2014/03/29]
- 29 25 7. Ghazalian F, Hakemi L, Pourkazemi L, et al. Effects of whole-body vibration training on  
30 26 fibrinolytic and coagulative factors in healthy young men. *J Res Med Sci* 2014;19(10):982-  
31 27 6. [published Online First: 2014/12/30]
- 32 28 8. Wang J, Leung KS, Chow SK, et al. The effect of whole body vibration on fracture healing - a  
33 29 systematic review. *European cells & materials* 2017;34:108-27. doi:  
34 30 10.22203/eCM.v034a08 [published Online First: 2017/09/08]
- 35 31 9. Yang X, Brobst D, Chan WS, et al. Muscle-generated BDNF is a sexually dimorphic myokine  
36 32 that controls metabolic flexibility. *Science signaling* 2019;12(594) doi:  
37 33 10.1126/scisignal.aau1468 [published Online First: 2019/08/15]
- 38 34 10. Rogan S, Hilfiker R, Herren K, et al. Effects of whole-body vibration on postural control in  
39 35 elderly: a systematic review and meta-analysis. *BMC geriatrics* 2011;11:72. doi:  
40 36 10.1186/1471-2318-11-72 [published Online First: 2011/11/08]
- 41 37 11. Cheung WH, Mok HW, Qin L, et al. High-frequency whole-body vibration improves balancing  
42 38 ability in elderly women. *Arch Phys Med Rehabil* 2007;88(7):852-7. doi:  
43 39 10.1016/j.apmr.2007.03.028 [published Online First: 2007/07/03]
- 44 40 12. Torvinen S, Kannus P, Sievanen H, et al. Effect of 8-month vertical whole body vibration on  
45 41 bone, muscle performance, and body balance: a randomized controlled study. *J Bone Miner*  
46 42 *Res* 2003;18(5):876-84. doi: 10.1359/jbmr.2003.18.5.876 [published Online First:  
47 43 2003/05/08]
- 48 44 13. Rubin C, Recker R, Cullen D, et al. Prevention of postmenopausal bone loss by a low-  
49 45 magnitude, high-frequency mechanical stimuli: a clinical trial assessing compliance,  
50  
51  
52  
53  
54  
55  
56  
57  
58  
59  
60

- 1 efficacy, and safety. *J Bone Miner Res* 2004;19(3):343-51. doi: 10.1359/JBMR.0301251  
2 [published Online First: 2004/03/26]
- 3 14. Verschueren SM, Roelants M, Delecluse C, et al. Effect of 6-month whole body vibration  
4 training on hip density, muscle strength, and postural control in postmenopausal women: a  
5 randomized controlled pilot study. *J Bone Miner Res* 2004;19(3):352-9. doi:  
6 10.1359/JBMR.0301245 [published Online First: 2004/03/26]
- 7 15. Ogborn DI, Gardiner PF. Effects of exercise and muscle type on BDNF, NT-4/5, and TrKB  
8 expression in skeletal muscle. *Muscle & nerve* 2010;41(3):385-91. doi:  
9 10.1002/mus.21503 [published Online First: 2009/10/09]
- 10 16. Wang X, Luo Y, Masci PP, et al. Influence of Interleukin-1 Beta on Platelet-Poor Plasma Clot  
11 Formation: A Potential Impact on Early Bone Healing. *PLoS One* 2016;11(2):e0149775.  
12 doi: 10.1371/journal.pone.0149775
- 13 17. Francis RM, Romeyn CL, Coughlin AM, et al. Age and aerobic training status effects on  
14 plasma and skeletal muscle tPA and PAI-1. *Eur J Appl Physiol* 2014;114(6):1229-38. doi:  
15 10.1007/s00421-014-2857-2 [published Online First: 2014/03/08]
- 16 18. Wong RMY, Choy MHV, Li MCM, et al. A systematic review of current osteoporotic  
17 metaphyseal fracture animal models. *Bone Joint Res* 2018;7(1):6-11. doi: 10.1302/2046-  
18 3758.71.BJR-2016-0334.R2
- 19 19. Hankenson KD, Zimmerman G, Marcucio R. Biological perspectives of delayed fracture  
20 healing. *Injury* 2014;45 Suppl 2:S8-S15. doi: 10.1016/j.injury.2014.04.003 [published  
21 Online First: 2014/05/27]
- 22 20. Zhu TY, Hung VW, Cheung WH, et al. Value of Measuring Bone Microarchitecture in Fracture  
23 Discrimination in Older Women with Recent Hip Fracture: A Case-control Study with HR-  
24 pQCT. *Scientific reports* 2016;6:34185. doi: 10.1038/srep34185 [published Online First:  
25 2016/09/28]
- 26 21. Wong RMY, Wong H, Zhang N, et al. The relationship between sarcopenia and fragility  
27 fracture-a systematic review. *Osteoporosis international : a journal established as result  
28 of cooperation between the European Foundation for Osteoporosis and the National  
29 Osteoporosis Foundation of the USA* 2019;30(3):541-53. doi: 10.1007/s00198-018-04828-  
30 0 [published Online First: 2019/01/06]
- 31 22. Thomas MV, Puleo DA. Infection, inflammation, and bone regeneration: a paradoxical  
32 relationship. *Journal of dental research* 2011;90(9):1052-61. doi:  
33 10.1177/0022034510393967 [published Online First: 2011/01/21]
- 34 23. Dishowitz MI, Mutyaba PL, Takacs JD, et al. Systemic inhibition of canonical Notch signaling  
35 results in sustained callus inflammation and alters multiple phases of fracture healing. *PLoS  
36 one* 2013;8(7):e68726. doi: 10.1371/journal.pone.0068726 [published Online First:  
37 2013/07/12]
- 38 24. Lim JC, Ko KI, Mattos M, et al. TNFalpha contributes to diabetes impaired angiogenesis in  
39 fracture healing. *Bone* 2017;99:26-38. doi: 10.1016/j.bone.2017.02.014 [published Online  
40 First: 2017/03/13]
- 41 25. Ono K, Han J. The p38 signal transduction pathway: activation and function. *Cellular  
42 signalling* 2000;12(1):1-13. [published Online First: 2000/02/17]
- 43 26. Wang H, Wan Y, Tam KF, et al. Resistive vibration exercise retards bone loss in weight-  
44 bearing skeletons during 60 days bed rest. *Osteoporos Int* 2012;23(8):2169-78. doi:  
45 10.1007/s00198-011-1839-z [published Online First: 2011/12/14]

- 1  
2  
3 1 27. Yang WS, Park YC, Kim JH, et al. Nanostructured, self-assembling peptide K5 blocks TNF-  
4 2 alpha and PGE(2) production by suppression of the AP-1/p38 pathway. *Mediators of*  
5 3 *inflammation* 2012;2012:489810. doi: 10.1155/2012/489810 [published Online First:  
6 4 2012/02/09]
- 8 5 28. Byeon SE, Lee J, Yoo BC, et al. p38-targeted inhibition of interleukin-12 expression by ethanol  
9 6 extract from *Cordyceps bassiana* in lipopolysaccharide-activated macrophages.  
10 7 *Immunopharmacology and immunotoxicology* 2011;33(1):90-6. doi:  
11 8 10.3109/08923973.2010.482137 [published Online First: 2010/05/19]
- 12 9 29. Greenblatt MB, Shim JH, Zou W, et al. The p38 MAPK pathway is essential for skeletogenesis  
13 10 and bone homeostasis in mice. *The Journal of clinical investigation* 2010;120(7):2457-73.  
14 11 doi: 10.1172/JCI42285 [published Online First: 2010/06/17]
- 16 12 30. Garcia J, Lemercier B, Roman-Roman S, et al. A *Mycoplasma fermentans*-derived synthetic  
17 13 lipopeptide induces AP-1 and NF-kappaB activity and cytokine secretion in macrophages  
18 14 via the activation of mitogen-activated protein kinase pathways. *The Journal of biological*  
19 15 *chemistry* 1998;273(51):34391-8. [published Online First: 1998/12/16]
- 20 16 31. Cheung WH, Li CY, Zhu TY, et al. Improvement in muscle performance after one-year  
21 17 cessation of low-magnitude high-frequency vibration in community elderly. *J*  
22 18 *Musculoskelet Neuronal Interact* 2016;16(1):4-11. [published Online First: 2016/03/06]
- 24 19  
25  
26 20  
27  
28  
29  
30  
31  
32  
33  
34  
35  
36  
37  
38  
39  
40  
41  
42  
43  
44  
45  
46  
47  
48  
49  
50  
51  
52  
53  
54  
55  
56  
57  
58  
59  
60

1  
2  
3 **1 FIGURE LEGEND**  
4  
5

6 **2 Figure 1** Flow diagram showing the grouping and assessments in this study.  
7  
8

9 **3 Figure 2** A vertical-oscillating vibration platform modified to provide a seating place for the  
10  
11  
12 4 research subject to receive the 20 min/day treatment. This representative vibration platform is  
13  
14 5 installed in a community centre situated in a public housing estate with 6692 units/families in the  
15  
16 6 Shatin district of Hong Kong.  
17  
18

19 7  
20  
21  
22 8 Word count: 2862  
23  
24  
25  
26  
27  
28  
29  
30  
31  
32  
33  
34  
35  
36  
37  
38  
39  
40  
41  
42  
43  
44  
45  
46  
47  
48  
49  
50  
51  
52  
53  
54  
55  
56  
57  
58  
59  
60

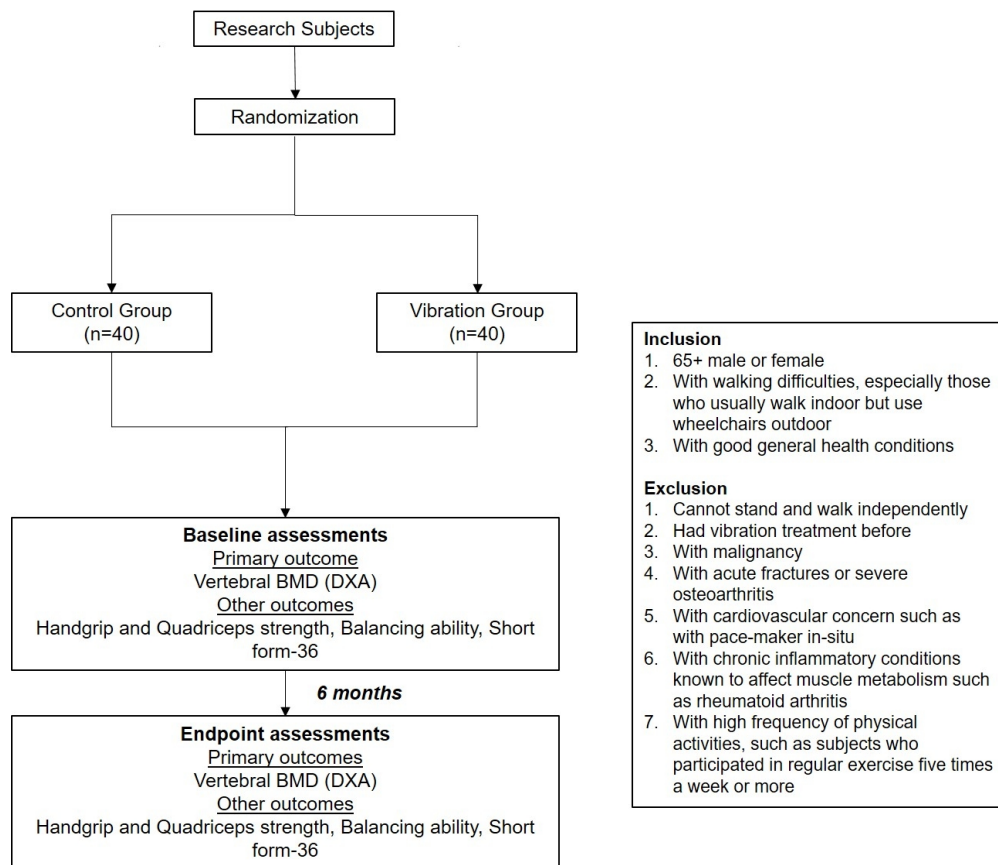

35 Flow diagram showing the grouping and assessments in this study.

36 109x96mm (300 x 300 DPI)

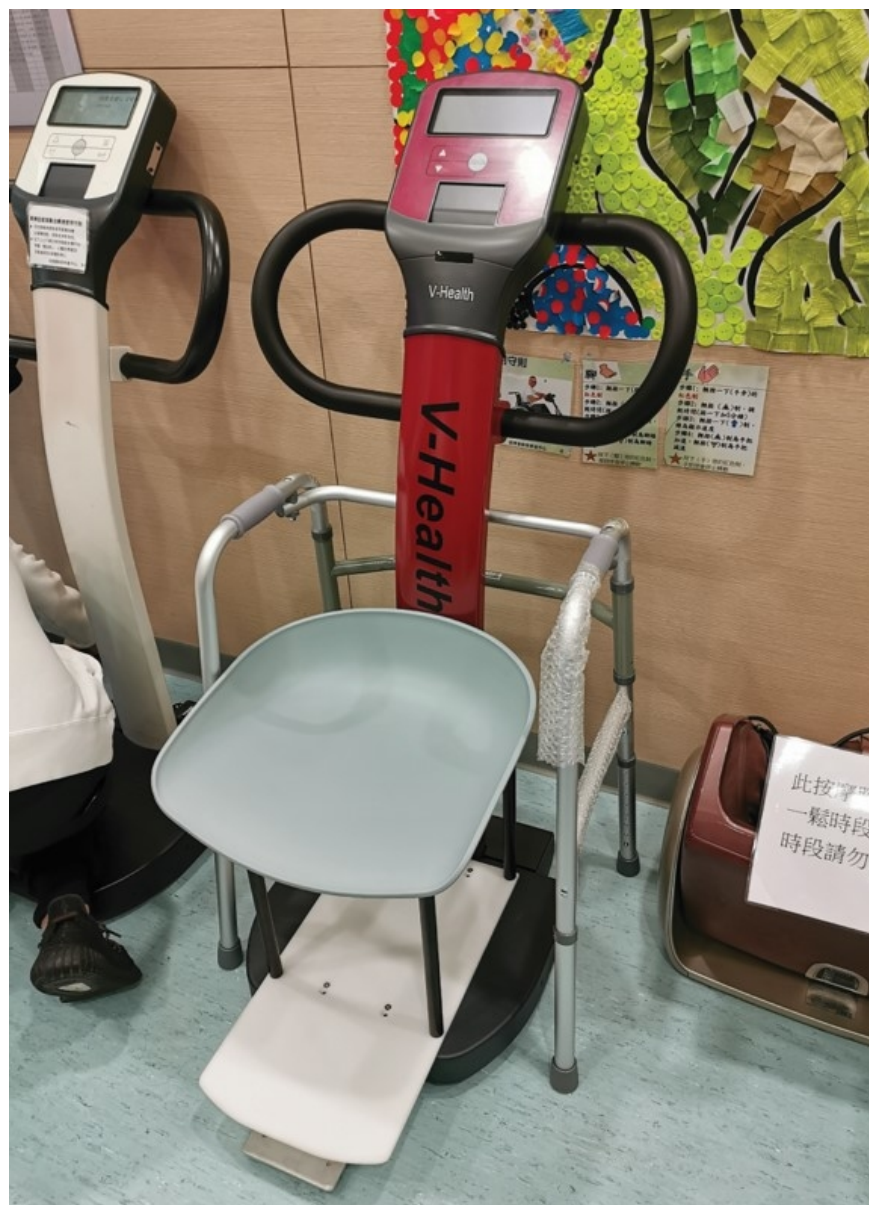

A vertical-oscillating vibration platform modified to provide a seating place for the research subject to receive the 20 min/day treatment. This representative vibration platform is installed in a community centre situated in a public housing estate with 6692 units/families in the Shatin district of Hong Kong.

48x67mm (300 x 300 DPI)



## 低幅高頻振動治療

### 對使用輪椅，行動不便的老年人在骨骼肌肉健康上的影響的研究

Efficacy of Low-magnitude High-frequency Vibration (LMHFV) on musculoskeletal health of subjects on wheelchair, a randomized controlled study

### 參加者同意書

#### Consent Form

我在此聲明：

I declare that:

1. 本人已閱讀及明白這份參與研究同意書，並且已經獲得提問的權利。我已經被知會我可能遇到的風險和得益。我所提出的問題已得到滿意的解答。

I confirm that I have read and understood the information sheet for the above study and have had the opportunity to ask questions. I have been told about the risks and benefits and I have had my questions answered to my satisfaction.

2. 我明白我的參與完全出於自願並且可以在任何時候退出，而無需任何理由。我的決定不會影響我所受到的醫療服務和法律權利。如果我決定退出這項研究，我同意之前收集到的資料可繼續被使用。

I understand that my participation is voluntary and that I am free to withdraw at any time, without giving any reason, without my medical care or legal rights being affected. If I decide to withdraw from this study, I agree that the information collected about me up to the point when I withdraw may continue to be processed.

3. 我明白機構審查委員會、倫理委員會或監察機構的成員可能會查閱我的醫療紀錄，我同意授權有關人員查閱我的記錄。

I understand that sections of any of my medical notes may be looked at by responsible individuals from regulatory authorities where it is relevant to my taking part in research. I give permission for these individuals to have access to my records.

4. 我同意參與這項研究。

I agree to take part in the above study.

5. 簽署這同意書並不表示我放棄任何權利。

I do not waive any liability rights by signing this form.

6. 我的簽署表示我已得到這檔的副本。我會保留這副本直至我參與完結為止。

My signature indicates that a copy of this form has been given to me and I will keep it until the end of my participation in the study.

\_\_\_\_\_  
參與者的簽署 (Signature)

\_\_\_\_\_  
參與者姓名 (Name of participant)

\_\_\_\_\_  
簽署日期 (Date)

\_\_\_\_\_  
研究者/代表簽署  
(Signature of investigator or delegate)

\_\_\_\_\_  
研究者/代表姓名  
(Name of investigator or delegate)

\_\_\_\_\_  
簽署日期 (Date)

# Reporting checklist for protocol of a clinical trial.

Based on the SPIRIT guidelines.

## Instructions to authors

Complete this checklist by entering the page numbers from your manuscript where readers will find each of the items listed below.

Your article may not currently address all the items on the checklist. Please modify your text to include the missing information. If you are certain that an item does not apply, please write "n/a" and provide a short explanation.

Upload your completed checklist as an extra file when you submit to a journal.

In your methods section, say that you used the SPIRIT reporting guidelines, and cite them as:

Chan A-W, Tetzlaff JM, Altman DG, Laupacis A, Gøtzsche PC, Krleža-Jerić K, Hróbjartsson A, Mann H, Dickersin K, Berlin J, Doré C, Parulekar W, Summerskill W, Groves T, Schulz K, Sox H, Rockhold FW, Rennie D, Moher D. SPIRIT 2013 Statement: Defining standard protocol items for clinical trials. *Ann Intern Med.* 2013;158(3):200-207

|                                   |                                                                                                                                 |  | Page   |
|-----------------------------------|---------------------------------------------------------------------------------------------------------------------------------|--|--------|
|                                   | Reporting Item                                                                                                                  |  | Number |
| <b>Administrative information</b> |                                                                                                                                 |  |        |
| Title                             | <a href="#">#1</a> Descriptive title identifying the study design, population, interventions, and, if applicable, trial acronym |  | 1      |

|    |                     |                     |                                                            |           |
|----|---------------------|---------------------|------------------------------------------------------------|-----------|
| 1  | Trial registration  | <a href="#">#2a</a> | Trial identifier and registry name. If not yet registered, | 3         |
| 2  |                     |                     | name of intended registry                                  |           |
| 3  |                     |                     |                                                            |           |
| 4  |                     |                     |                                                            |           |
| 5  |                     |                     |                                                            |           |
| 6  | Trial registration: | <a href="#">#2b</a> | All items from the World Health Organization Trial         | See this  |
| 7  | data set            |                     | Registration Data Set                                      | checklist |
| 8  |                     |                     |                                                            |           |
| 9  |                     |                     |                                                            |           |
| 10 |                     |                     |                                                            |           |
| 11 |                     |                     |                                                            |           |
| 12 | Protocol version    | <a href="#">#3</a>  | Date and version identifier                                | n/a       |
| 13 |                     |                     |                                                            |           |
| 14 |                     |                     |                                                            |           |
| 15 | Funding             | <a href="#">#4</a>  | Sources and types of financial, material, and other        | 14        |
| 16 |                     |                     | support                                                    |           |
| 17 |                     |                     |                                                            |           |
| 18 |                     |                     |                                                            |           |
| 19 |                     |                     |                                                            |           |
| 20 | Roles and           | <a href="#">#5a</a> | Names, affiliations, and roles of protocol contributors    | n/a       |
| 21 | responsibilities:   |                     |                                                            |           |
| 22 |                     |                     |                                                            |           |
| 23 | contributorship     |                     |                                                            |           |
| 24 |                     |                     |                                                            |           |
| 25 |                     |                     |                                                            |           |
| 26 |                     |                     |                                                            |           |
| 27 |                     |                     |                                                            |           |
| 28 | Roles and           | <a href="#">#5b</a> | Name and contact information for the trial sponsor         | n/a       |
| 29 | responsibilities:   |                     |                                                            |           |
| 30 |                     |                     |                                                            |           |
| 31 | sponsor contact     |                     |                                                            |           |
| 32 | information         |                     |                                                            |           |
| 33 |                     |                     |                                                            |           |
| 34 |                     |                     |                                                            |           |
| 35 |                     |                     |                                                            |           |
| 36 |                     |                     |                                                            |           |
| 37 |                     |                     |                                                            |           |
| 38 | Roles and           | <a href="#">#5c</a> | Role of study sponsor and funders, if any, in study        | n/a       |
| 39 | responsibilities:   |                     | design; collection, management, analysis, and              |           |
| 40 |                     |                     | interpretation of data; writing of the report; and the     |           |
| 41 | sponsor and funder  |                     | decision to submit the report for publication, including   |           |
| 42 |                     |                     | whether they will have ultimate authority over any of      |           |
| 43 |                     |                     | these activities                                           |           |
| 44 |                     |                     |                                                            |           |
| 45 |                     |                     |                                                            |           |
| 46 |                     |                     |                                                            |           |
| 47 |                     |                     |                                                            |           |
| 48 |                     |                     |                                                            |           |
| 49 |                     |                     |                                                            |           |
| 50 |                     |                     |                                                            |           |
| 51 |                     |                     |                                                            |           |
| 52 | Roles and           | <a href="#">#5d</a> | Composition, roles, and responsibilities of the            | n/a       |
| 53 | responsibilities:   |                     | coordinating centre, steering committee, endpoint          |           |
| 54 |                     |                     | adjudication committee, data management team, and          |           |
| 55 | committees          |                     |                                                            |           |
| 56 |                     |                     |                                                            |           |
| 57 |                     |                     |                                                            |           |
| 58 |                     |                     |                                                            |           |
| 59 |                     |                     |                                                            |           |
| 60 |                     |                     |                                                            |           |

other individuals or groups overseeing the trial, if applicable (see Item 21a for data monitoring committee)

## Introduction

|                                                 |                     |                                                                                                                                                                                                            |     |
|-------------------------------------------------|---------------------|------------------------------------------------------------------------------------------------------------------------------------------------------------------------------------------------------------|-----|
| Background and rationale                        | <a href="#">#6a</a> | Description of research question and justification for undertaking the trial, including summary of relevant studies (published and unpublished) examining benefits and harms for each intervention         | 4-5 |
| Background and rationale: choice of comparators | <a href="#">#6b</a> | Explanation for choice of comparators                                                                                                                                                                      | 4   |
| Objectives                                      | <a href="#">#7</a>  | Specific objectives or hypotheses                                                                                                                                                                          | 5   |
| Trial design                                    | <a href="#">#8</a>  | Description of trial design including type of trial (eg, parallel group, crossover, factorial, single group), allocation ratio, and framework (eg, superiority, equivalence, non-inferiority, exploratory) | 4-5 |
| <b>Methods:</b>                                 |                     |                                                                                                                                                                                                            |     |
| Participants, interventions, and outcomes       |                     |                                                                                                                                                                                                            |     |
| Study setting                                   | <a href="#">#9</a>  | Description of study settings (eg, community clinic, academic hospital) and list of countries where data will be collected. Reference to where list of study sites can be obtained                         | 5   |

|    |                      |                      |                                                              |      |
|----|----------------------|----------------------|--------------------------------------------------------------|------|
| 1  | Eligibility criteria | <a href="#">#10</a>  | Inclusion and exclusion criteria for participants. If        | 6    |
| 2  |                      |                      |                                                              |      |
| 3  |                      |                      |                                                              |      |
| 4  |                      |                      | applicable, eligibility criteria for study centres and       |      |
| 5  |                      |                      |                                                              |      |
| 6  |                      |                      | individuals who will perform the interventions (eg,          |      |
| 7  |                      |                      |                                                              |      |
| 8  |                      |                      | surgeons, psychotherapists)                                  |      |
| 9  |                      |                      |                                                              |      |
| 10 |                      |                      |                                                              |      |
| 11 | Interventions:       | <a href="#">#11a</a> | Interventions for each group with sufficient detail to allow | 7-8  |
| 12 |                      |                      |                                                              |      |
| 13 | description          |                      | replication, including how and when they will be             |      |
| 14 |                      |                      |                                                              |      |
| 15 |                      |                      |                                                              |      |
| 16 |                      |                      | administered                                                 |      |
| 17 |                      |                      |                                                              |      |
| 18 |                      |                      |                                                              |      |
| 19 | Interventions:       | <a href="#">#11b</a> | Criteria for discontinuing or modifying allocated            | n/a  |
| 20 |                      |                      |                                                              |      |
| 21 | modifications        |                      | interventions for a given trial participant (eg, drug dose   |      |
| 22 |                      |                      |                                                              |      |
| 23 |                      |                      | change in response to harms, participant request, or         |      |
| 24 |                      |                      |                                                              |      |
| 25 |                      |                      | improving / worsening disease)                               |      |
| 26 |                      |                      |                                                              |      |
| 27 |                      |                      |                                                              |      |
| 28 |                      |                      |                                                              |      |
| 29 | Interventions:       | <a href="#">#11c</a> | Strategies to improve adherence to intervention              | 7    |
| 30 |                      |                      |                                                              |      |
| 31 | adherence            |                      | protocols, and any procedures for monitoring adherence       |      |
| 32 |                      |                      |                                                              |      |
| 33 |                      |                      | (eg, drug tablet return; laboratory tests)                   |      |
| 34 |                      |                      |                                                              |      |
| 35 |                      |                      |                                                              |      |
| 36 | Interventions:       | <a href="#">#11d</a> | Relevant concomitant care and interventions that are         | n/a  |
| 37 |                      |                      |                                                              |      |
| 38 | concomitant care     |                      | permitted or prohibited during the trial                     |      |
| 39 |                      |                      |                                                              |      |
| 40 |                      |                      |                                                              |      |
| 41 |                      |                      |                                                              |      |
| 42 | Outcomes             | <a href="#">#12</a>  | Primary, secondary, and other outcomes, including the        | 8-10 |
| 43 |                      |                      |                                                              |      |
| 44 |                      |                      | specific measurement variable (eg, systolic blood            |      |
| 45 |                      |                      |                                                              |      |
| 46 |                      |                      | pressure), analysis metric (eg, change from baseline,        |      |
| 47 |                      |                      |                                                              |      |
| 48 |                      |                      | final value, time to event), method of aggregation (eg,      |      |
| 49 |                      |                      |                                                              |      |
| 50 |                      |                      | median, proportion), and time point for each outcome.        |      |
| 51 |                      |                      |                                                              |      |
| 52 |                      |                      |                                                              |      |
| 53 |                      |                      | Explanation of the clinical relevance of chosen efficacy     |      |
| 54 |                      |                      |                                                              |      |
| 55 |                      |                      | and harm outcomes is strongly recommended                    |      |
| 56 |                      |                      |                                                              |      |
| 57 |                      |                      |                                                              |      |
| 58 |                      |                      |                                                              |      |
| 59 |                      |                      |                                                              |      |
| 60 |                      |                      |                                                              |      |

|    |                           |                      |                                                           |          |
|----|---------------------------|----------------------|-----------------------------------------------------------|----------|
| 1  | Participant timeline      | <a href="#">#13</a>  | Time schedule of enrolment, interventions (including any  | 5-7;     |
| 2  |                           |                      | run-ins and washouts), assessments, and visits for        | Figure 2 |
| 3  |                           |                      | participants. A schematic diagram is highly               |          |
| 4  |                           |                      | recommended (see Figure)                                  |          |
| 5  |                           |                      |                                                           |          |
| 6  |                           |                      |                                                           |          |
| 7  |                           |                      |                                                           |          |
| 8  |                           |                      |                                                           |          |
| 9  |                           |                      |                                                           |          |
| 10 |                           |                      |                                                           |          |
| 11 | Sample size               | <a href="#">#14</a>  | Estimated number of participants needed to achieve        | 10       |
| 12 |                           |                      | study objectives and how it was determined, including     |          |
| 13 |                           |                      | clinical and statistical assumptions supporting any       |          |
| 14 |                           |                      | sample size calculations                                  |          |
| 15 |                           |                      |                                                           |          |
| 16 |                           |                      |                                                           |          |
| 17 |                           |                      |                                                           |          |
| 18 |                           |                      |                                                           |          |
| 19 |                           |                      |                                                           |          |
| 20 |                           |                      |                                                           |          |
| 21 | Recruitment               | <a href="#">#15</a>  | Strategies for achieving adequate participant enrolment   | 10       |
| 22 |                           |                      | to reach target sample size                               |          |
| 23 |                           |                      |                                                           |          |
| 24 |                           |                      |                                                           |          |
| 25 |                           |                      |                                                           |          |
| 26 | <b>Methods:</b>           |                      |                                                           |          |
| 27 |                           |                      |                                                           |          |
| 28 | <b>Assignment of</b>      |                      |                                                           |          |
| 29 | <b>interventions (for</b> |                      |                                                           |          |
| 30 | <b>controlled trials)</b> |                      |                                                           |          |
| 31 |                           |                      |                                                           |          |
| 32 |                           |                      |                                                           |          |
| 33 |                           |                      |                                                           |          |
| 34 |                           |                      |                                                           |          |
| 35 |                           |                      |                                                           |          |
| 36 | Allocation: sequence      | <a href="#">#16a</a> | Method of generating the allocation sequence (eg,         | 7        |
| 37 | generation                |                      | computer-generated random numbers), and list of any       |          |
| 38 |                           |                      | factors for stratification. To reduce predictability of a |          |
| 39 |                           |                      | random sequence, details of any planned restriction (eg,  |          |
| 40 |                           |                      | blocking) should be provided in a separate document       |          |
| 41 |                           |                      | that is unavailable to those who enrol participants or    |          |
| 42 |                           |                      | assign interventions                                      |          |
| 43 |                           |                      |                                                           |          |
| 44 |                           |                      |                                                           |          |
| 45 |                           |                      |                                                           |          |
| 46 |                           |                      |                                                           |          |
| 47 |                           |                      |                                                           |          |
| 48 |                           |                      |                                                           |          |
| 49 |                           |                      |                                                           |          |
| 50 |                           |                      |                                                           |          |
| 51 |                           |                      |                                                           |          |
| 52 |                           |                      |                                                           |          |
| 53 | Allocation                | <a href="#">#16b</a> | Mechanism of implementing the allocation sequence (eg,    | 7        |
| 54 | concealment               |                      | central telephone; sequentially numbered, opaque,         |          |
| 55 |                           |                      |                                                           |          |
| 56 |                           |                      |                                                           |          |
| 57 |                           |                      |                                                           |          |
| 58 | mechanism                 |                      |                                                           |          |
| 59 |                           |                      |                                                           |          |
| 60 |                           |                      |                                                           |          |

sealed envelopes), describing any steps to conceal the sequence until interventions are assigned

|    |                        |                      |                                                             |
|----|------------------------|----------------------|-------------------------------------------------------------|
| 1  |                        |                      |                                                             |
| 2  |                        |                      |                                                             |
| 3  |                        |                      |                                                             |
| 4  |                        |                      |                                                             |
| 5  |                        |                      |                                                             |
| 6  | Allocation:            | <a href="#">#16c</a> | Who will generate the allocation sequence, who will         |
| 7  |                        |                      |                                                             |
| 8  | implementation         |                      | enrol participants, and who will assign participants to     |
| 9  |                        |                      | interventions                                               |
| 10 |                        |                      |                                                             |
| 11 |                        |                      |                                                             |
| 12 |                        |                      |                                                             |
| 13 | Blinding (masking)     | <a href="#">#17a</a> | Who will be blinded after assignment to interventions       |
| 14 |                        |                      |                                                             |
| 15 |                        |                      | (eg, trial participants, care providers, outcome            |
| 16 |                        |                      | assessors, data analysts), and how                          |
| 17 |                        |                      |                                                             |
| 18 |                        |                      |                                                             |
| 19 |                        |                      |                                                             |
| 20 |                        |                      |                                                             |
| 21 | Blinding (masking):    | <a href="#">#17b</a> | If blinded, circumstances under which unblinding is         |
| 22 |                        |                      |                                                             |
| 23 | emergency              |                      | permissible, and procedure for revealing a participant's    |
| 24 |                        |                      | allocated intervention during the trial                     |
| 25 | unblinding             |                      |                                                             |
| 26 |                        |                      |                                                             |
| 27 |                        |                      |                                                             |
| 28 |                        |                      |                                                             |
| 29 | <b>Methods: Data</b>   |                      |                                                             |
| 30 |                        |                      |                                                             |
| 31 | <b>collection,</b>     |                      |                                                             |
| 32 |                        |                      |                                                             |
| 33 | <b>management, and</b> |                      |                                                             |
| 34 |                        |                      |                                                             |
| 35 | <b>analysis</b>        |                      |                                                             |
| 36 |                        |                      |                                                             |
| 37 |                        |                      |                                                             |
| 38 | Data collection plan   | <a href="#">#18a</a> | Plans for assessment and collection of outcome,             |
| 39 |                        |                      |                                                             |
| 40 |                        |                      | baseline, and other trial data, including any related       |
| 41 |                        |                      | processes to promote data quality (eg, duplicate            |
| 42 |                        |                      | measurements, training of assessors) and a description      |
| 43 |                        |                      | of study instruments (eg, questionnaires, laboratory        |
| 44 |                        |                      | tests) along with their reliability and validity, if known. |
| 45 |                        |                      |                                                             |
| 46 |                        |                      | Reference to where data collection forms can be found,      |
| 47 |                        |                      |                                                             |
| 48 |                        |                      | if not in the protocol                                      |
| 49 |                        |                      |                                                             |
| 50 |                        |                      |                                                             |
| 51 |                        |                      |                                                             |
| 52 |                        |                      |                                                             |
| 53 |                        |                      |                                                             |
| 54 |                        |                      |                                                             |
| 55 |                        |                      |                                                             |
| 56 |                        |                      |                                                             |
| 57 |                        |                      |                                                             |
| 58 |                        |                      |                                                             |
| 59 |                        |                      |                                                             |
| 60 |                        |                      |                                                             |

|    |                            |                      |                                                             |         |
|----|----------------------------|----------------------|-------------------------------------------------------------|---------|
| 1  | Data collection plan:      | <a href="#">#18b</a> | Plans to promote participant retention and complete         | 7       |
| 2  |                            |                      |                                                             |         |
| 3  | retention                  |                      | follow-up, including list of any outcome data to be         |         |
| 4  |                            |                      | collected for participants who discontinue or deviate from  |         |
| 5  |                            |                      | intervention protocols                                      |         |
| 6  |                            |                      |                                                             |         |
| 7  |                            |                      |                                                             |         |
| 8  |                            |                      |                                                             |         |
| 9  |                            |                      |                                                             |         |
| 10 |                            |                      |                                                             |         |
| 11 | Data management            | <a href="#">#19</a>  | Plans for data entry, coding, security, and storage,        | 11      |
| 12 |                            |                      | including any related processes to promote data quality     |         |
| 13 |                            |                      | (eg, double data entry; range checks for data values).      |         |
| 14 |                            |                      | Reference to where details of data management               |         |
| 15 |                            |                      | procedures can be found, if not in the protocol             |         |
| 16 |                            |                      |                                                             |         |
| 17 |                            |                      |                                                             |         |
| 18 |                            |                      |                                                             |         |
| 19 |                            |                      |                                                             |         |
| 20 |                            |                      |                                                             |         |
| 21 |                            |                      |                                                             |         |
| 22 |                            |                      |                                                             |         |
| 23 | Statistics: outcomes       | <a href="#">#20a</a> | Statistical methods for analysing primary and secondary     | 10-11   |
| 24 |                            |                      | outcomes. Reference to where other details of the           |         |
| 25 |                            |                      | statistical analysis plan can be found, if not in the       |         |
| 26 |                            |                      | protocol                                                    |         |
| 27 |                            |                      |                                                             |         |
| 28 |                            |                      |                                                             |         |
| 29 |                            |                      |                                                             |         |
| 30 |                            |                      |                                                             |         |
| 31 |                            |                      |                                                             |         |
| 32 |                            |                      |                                                             |         |
| 33 | Statistics: additional     | <a href="#">#20b</a> | Methods for any additional analyses (eg, subgroup and       | n/a     |
| 34 | analyses                   |                      | adjusted analyses)                                          |         |
| 35 |                            |                      |                                                             |         |
| 36 |                            |                      |                                                             |         |
| 37 |                            |                      |                                                             |         |
| 38 |                            |                      |                                                             |         |
| 39 | Statistics: analysis       | <a href="#">#20c</a> | Definition of analysis population relating to protocol non- | n/a     |
| 40 | population and             |                      | adherence (eg, as randomised analysis), and any             |         |
| 41 | missing data               |                      | statistical methods to handle missing data (eg, multiple    |         |
| 42 |                            |                      | imputation)                                                 |         |
| 43 |                            |                      |                                                             |         |
| 44 |                            |                      |                                                             |         |
| 45 |                            |                      |                                                             |         |
| 46 |                            |                      |                                                             |         |
| 47 |                            |                      |                                                             |         |
| 48 | <b>Methods: Monitoring</b> |                      |                                                             |         |
| 49 |                            |                      |                                                             |         |
| 50 |                            |                      |                                                             |         |
| 51 | Data monitoring:           | <a href="#">#21a</a> | Composition of data monitoring committee (DMC);             | See     |
| 52 | formal committee           |                      | summary of its role and reporting structure; statement of   | comment |
| 53 |                            |                      | whether it is independent from the sponsor and              |         |
| 54 |                            |                      |                                                             |         |
| 55 |                            |                      |                                                             |         |
| 56 |                            |                      |                                                             |         |
| 57 |                            |                      |                                                             |         |
| 58 |                            |                      |                                                             |         |
| 59 |                            |                      |                                                             |         |
| 60 |                            |                      |                                                             |         |



1 competing interests; and reference to where further  
 2 details about its charter can be found, if not in the  
 3 protocol. Alternatively, an explanation of why a DMC is  
 4 not needed  
 5  
 6  
 7  
 8  
 9

10 *(DMC is unlikely to have the opportunity to make a*  
 11 *difference in this short term study where patient follow up*  
 12 *is only 6 months and this study has minimal patient risk)*  
 13  
 14  
 15  
 16  
 17  
 18  
 19  
 20

|                                                 |                      |                                                                                                                                                                                                     |     |
|-------------------------------------------------|----------------------|-----------------------------------------------------------------------------------------------------------------------------------------------------------------------------------------------------|-----|
| 21 Data monitoring:<br>22 interim analysis      | <a href="#">#21b</a> | Description of any interim analyses and stopping<br>23 guidelines, including who will have access to these<br>24 interim results and make the final decision to terminate<br>25 the trial           | n/a |
| 31 Harms                                        | <a href="#">#22</a>  | Plans for collecting, assessing, reporting, and managing<br>32 solicited and spontaneously reported adverse events<br>33 and other unintended effects of trial interventions or trial<br>34 conduct | 10  |
| 41 Auditing                                     | <a href="#">#23</a>  | Frequency and procedures for auditing trial conduct, if<br>42 any, and whether the process will be independent from<br>43 investigators and the sponsor                                             | n/a |
| 48 <b>Ethics and</b><br>49 <b>dissemination</b> |                      |                                                                                                                                                                                                     |     |
| 54 Research ethics<br>55 approval               | <a href="#">#24</a>  | Plans for seeking research ethics committee /<br>56 institutional review board (REC / IRB) approval                                                                                                 | 15  |

|                                                             |                                      |                      |                                                                                                                                                                                                                                    |     |
|-------------------------------------------------------------|--------------------------------------|----------------------|------------------------------------------------------------------------------------------------------------------------------------------------------------------------------------------------------------------------------------|-----|
| 1<br>2<br>3<br>4<br>5<br>6<br>7<br>8<br>9<br>10<br>11<br>12 | Protocol amendments                  | <a href="#">#25</a>  | Plans for communicating important protocol modifications (eg, changes to eligibility criteria, outcomes, analyses) to relevant parties (eg, investigators, REC / IRBs, trial participants, trial registries, journals, regulators) | n/a |
| 13<br>14<br>15<br>16<br>17<br>18<br>19<br>20                | Consent or assent                    | <a href="#">#26a</a> | Who will obtain informed consent or assent from potential trial participants or authorised surrogates, and how (see Item 32)                                                                                                       | 6   |
| 21<br>22<br>23<br>24<br>25<br>26<br>27<br>28                | Consent or assent: ancillary studies | <a href="#">#26b</a> | Additional consent provisions for collection and use of participant data and biological specimens in ancillary studies, if applicable                                                                                              | n/a |
| 29<br>30<br>31<br>32<br>33<br>34<br>35<br>36<br>37<br>38    | Confidentiality                      | <a href="#">#27</a>  | How personal information about potential and enrolled participants will be collected, shared, and maintained in order to protect confidentiality before, during, and after the trial                                               | 11  |
| 39<br>40<br>41<br>42<br>43                                  | Declaration of interests             | <a href="#">#28</a>  | Financial and other competing interests for principal investigators for the overall trial and each study site                                                                                                                      | 15  |
| 44<br>45<br>46<br>47<br>48<br>49<br>50                      | Data access                          | <a href="#">#29</a>  | Statement of who will have access to the final trial dataset, and disclosure of contractual agreements that limit such access for investigators                                                                                    | 11  |
| 51<br>52<br>53<br>54<br>55<br>56<br>57<br>58<br>59<br>60    | Ancillary and post trial care        | <a href="#">#30</a>  | Provisions, if any, for ancillary and post-trial care, and for compensation to those who suffer harm from trial participation                                                                                                      | n/a |

1 Dissemination policy: [#31a](#) Plans for investigators and sponsor to communicate trial 12  
 2 trial results results to participants, healthcare professionals, the  
 3 public, and other relevant groups (eg, via publication,  
 4 reporting in results databases, or other data sharing  
 5 arrangements), including any publication restrictions  
 6  
 7  
 8  
 9  
 10  
 11  
 12

13 Dissemination policy: [#31b](#) Authorship eligibility guidelines and any intended use of n/a  
 14 authorship professional writers  
 15  
 16  
 17

18 Dissemination policy: [#31c](#) Plans, if any, for granting public access to the full n/a  
 19 reproducible protocol, participant-level dataset, and statistical code  
 20 research  
 21  
 22  
 23  
 24  
 25

## 26 Appendices

27  
 28  
 29 Informed consent [#32](#) Model consent form and other related documentation See  
 30 materials given to participants and authorised surrogates uploaded  
 31 document  
 32  
 33  
 34  
 35

36 Biological specimens [#33](#) Plans for collection, laboratory evaluation, and storage of n/a  
 37 biological specimens for genetic or molecular analysis in  
 38 the current trial and for future use in ancillary studies, if  
 39 applicable  
 40  
 41  
 42  
 43  
 44  
 45

46 None The SPIRIT checklist is distributed under the terms of the Creative Commons Attribution  
 47 License CC-BY-ND 3.0. This checklist can be completed online using <https://www.goodreports.org/>, a  
 48 tool made by the [EQUATOR Network](#) in collaboration with [Penelope.ai](#)  
 49  
 50  
 51  
 52  
 53  
 54  
 55  
 56  
 57  
 58  
 59  
 60

# BMJ Open

## Efficacy of Low-magnitude High-frequency Vibration (LMHFV) on Musculoskeletal Health of Participants on Wheelchair: A Study Protocol for A Single-blinded Randomized Controlled Study

|                                 |                                                                                                                                                                                                                                                                                                                       |
|---------------------------------|-----------------------------------------------------------------------------------------------------------------------------------------------------------------------------------------------------------------------------------------------------------------------------------------------------------------------|
| Journal:                        | <i>BMJ Open</i>                                                                                                                                                                                                                                                                                                       |
| Manuscript ID                   | bmjopen-2020-038578.R1                                                                                                                                                                                                                                                                                                |
| Article Type:                   | Protocol                                                                                                                                                                                                                                                                                                              |
| Date Submitted by the Author:   | 29-Oct-2020                                                                                                                                                                                                                                                                                                           |
| Complete List of Authors:       | Chow, Simon Kwoon Ho; Chinese University of Hong Kong, Ho, Chung Yan; Chinese University of Hong Kong Wong, Hiu Wun; Chinese University of Hong Kong Chim, Yu Ning; Chinese University of Hong Kong, Wong, Ronald Wong Man-Yeung ; Chinese University of Hong Kong Cheung, Wing Hoi; Chinese University of Hong Kong, |
| <b>Primary Subject Heading</b>: | Rehabilitation medicine                                                                                                                                                                                                                                                                                               |
| Secondary Subject Heading:      | Geriatric medicine                                                                                                                                                                                                                                                                                                    |
| Keywords:                       | Musculoskeletal disorders < ORTHOPAEDIC & TRAUMA SURGERY, GERIATRIC MEDICINE, Bone diseases < ORTHOPAEDIC & TRAUMA SURGERY                                                                                                                                                                                            |
|                                 |                                                                                                                                                                                                                                                                                                                       |

SCHOLARONE™  
Manuscripts



I, the Submitting Author has the right to grant and does grant on behalf of all authors of the Work (as defined in the below author licence), an exclusive licence and/or a non-exclusive licence for contributions from authors who are: i) UK Crown employees; ii) where BMJ has agreed a CC-BY licence shall apply, and/or iii) in accordance with the terms applicable for US Federal Government officers or employees acting as part of their official duties; on a worldwide, perpetual, irrevocable, royalty-free basis to BMJ Publishing Group Ltd ("BMJ") its licensees and where the relevant Journal is co-owned by BMJ to the co-owners of the Journal, to publish the Work in this journal and any other BMJ products and to exploit all rights, as set out in our [licence](#).

The Submitting Author accepts and understands that any supply made under these terms is made by BMJ to the Submitting Author unless you are acting as an employee on behalf of your employer or a postgraduate student of an affiliated institution which is paying any applicable article publishing charge ("APC") for Open Access articles. Where the Submitting Author wishes to make the Work available on an Open Access basis (and intends to pay the relevant APC), the terms of reuse of such Open Access shall be governed by a Creative Commons licence – details of these licences and which [Creative Commons](#) licence will apply to this Work are set out in our licence referred to above.

Other than as permitted in any relevant BMJ Author's Self Archiving Policies, I confirm this Work has not been accepted for publication elsewhere, is not being considered for publication elsewhere and does not duplicate material already published. I confirm all authors consent to publication of this Work and authorise the granting of this licence.

1  
2  
3 1 **Efficacy of Low-magnitude High-frequency Vibration (LMHFV) on Musculoskeletal**  
4  
5 2 **Health of Participants on Wheelchair: A Study Protocol for A Single-blinded Randomized**  
6  
7 3 **Controlled Study**  
8  
9

10 4 Simon Kwoon-Ho Chow <sup>1,2</sup>, Chung Yan Ho <sup>1</sup>, Hiu Wun Wong<sup>1</sup>, Yu Ning Chim<sup>1</sup>, Ronald Man  
11  
12 5 Yeung Wong <sup>1</sup>, Wing Hoi Cheung <sup>1,2</sup>  
13  
14  
15  
16  
17  
18

19 7 **Author Affiliations**  
20  
21

22 8 <sup>1</sup> Department of Orthopaedics and Traumatology, Prince of Wales Hospital, The Chinese  
23  
24 9 University of Hong Kong, Hong Kong SAR, China.  
25  
26

27 10 <sup>2</sup>The CUHK-ACC Space Medicine Centre on Health Maintenance of Musculoskeletal System,  
28  
29 11 The Chinese University of Hong Kong Shenzhen Research Institute, Shenzhen, PR China.  
30  
31  
32  
33  
34

35 13 **Correspondence to:**  
36  
37

38 14 Wing Hoi Cheung, PhD, Department of Orthopaedics and Traumatology, 5/F, Clinical Sciences  
39  
40 15 Building, The Chinese University of Hong Kong, Shatin, New Territories, Hong Kong SAR, China.  
41  
42

43 16 E-mail: [louischeung@cuhk.edu.hk](mailto:louischeung@cuhk.edu.hk); Telephone: (852) 3505-1559; Fax: (852) 3505-4618  
44  
45  
46  
47  
48  
49  
50  
51  
52  
53  
54  
55  
56  
57  
58  
59  
60

## 1 **ABSTRACT**

### 2 **Background**

3 Osteoporosis is an age-related disease with progressive loss of bone, leading to fragile bone. It is  
4 one of the major health issues in older adults and causes medical, social and economic impacts  
5 globally. Patients with osteoporosis have high risk of osteoporotic fractures. Low-magnitude  
6 high-frequency vibration (LMHFV) is a non-invasive biophysical intervention providing whole-  
7 body mechanical stimulation. Previous studies showed that LMHFV is beneficial to **muscle**  
8 **strength, postural control, balancing ability, new bone formation, spinal bone mineral density**  
9 **(BMD), and blood circulation.** During the LMHFV treatment, older adults need to stand upright  
10 on the platform for 20min/day. However, some physically weak elderlies with poor  
11 musculoskeletal ability cannot stand for a long period. Therefore, the design of vibration  
12 platform is modified for the disabled patients to treat at sitting position and the efficacy of  
13 LMHFV on this group of elderlies will be verified. It is hypothesized that new design of  
14 LMHFV is beneficial to wheelchair users in terms of vertebral BMD, muscle health and  
15 musculoskeletal functions.

### 16 **Methods**

17 This study is a single-blinded randomized controlled trial to investigate the effect of LMHFV on  
18 vertebral BMD, muscle health, balancing ability and functional ability in wheelchair users  
19 (mainly on wheelchair for outdoor activities).

20 Healthy elderlies aged 65 years or above, with walking difficulties and using wheelchair are  
21 eligible. Exclusion criteria are those: [1] cannot stand and walk independently, [2] have vibration  
22 treatment before, [3] with malignancy, [4] with acute fractures or severe osteoarthritis, [5] with

1 cardiovascular concern such as with pace-maker in-situ, [6] with chronic inflammatory  
2 conditions known to affect muscle metabolism such as rheumatoid arthritis, and [7] with high  
3 frequency of physical activities, such as participants who participated in regular exercise five  
4 times a week or more.

5 Recruited participants will be randomized to either LMHFV or control group. Participant  
6 assigned to LMHFV group will receive LMHFV (35Hz, 0.3g, 20min/day, at least 3 times/week)  
7 for 6 months. The primary outcome is BMD at the lumbar spine to be assessed by dual-energy  
8 X-ray absorptiometry (DXA) that is clinically recommended for the diagnosis of osteoporosis.  
9 All primary and secondary outcome assessments for all groups will be performed in the  
10 investigators' institute at baseline and 6 months post-treatment.

## 11 **Discussion**

12 This study aims to investigate the effects of LMHFV on wheelchair users. The findings of this  
13 study will help to confirm the efficacy of LMHFV on vertebral BMD, muscle health, balancing  
14 ability and functional outcomes in wheelchair using elderlies. LMHFV therapy is an  
15 intervention strategy that is easy to implement at the community healthcare level or individually  
16 at home that has previously been proven to reduce fall risk and muscle strength at the lower limb.  
17 The ultimate goal is to improve their bone and muscle quality of wheelchair users, as well as  
18 enhancing their quality of life.

## 19 **Article summary**

### 20 **Strengths and limitations of this study**

- 21 • This is the first study that investigates the efficacy of LMHFV on wheelchair users, hence  
22 data generated will be with high clinical translation values.



- 1 • This trial cannot be double-blinded since blinding subjects for the LMHFV treatment is  
2 not feasible.
- 3 • The vibration signals can be easily felt and placebo is rare in vibration studies.

#### 4 **Trial registration**

5 ClinicalTrials.gov NCT04180267. Registered on Nov 26th, 2019.

#### 6 **Keywords**

7 Osteoporosis, Vibration Therapy, Wheelchair users, Vertebral BMD, LMHFV

#### 8 **BACKGROUND**

9 Ageing is an emerging socio-economic problem in Hong Kong. The ageing population at 65 or  
10 above increased continuously from 0.46 million (8.2%) to 1.27 million (17.9%) from 1988 to  
11 2018 <sup>1</sup>. The prevalence of osteoporosis also increases due to the escalating ageing population <sup>2</sup>.  
12 Osteoporosis is an age-induced disorder with progressive loss of bone that leads to deterioration  
13 of bone microarchitecture and hence low BMD. It increases the risk of fragility fracture known  
14 to be associated with increased morbidity and mortality <sup>3</sup>.  
15 Older adults with disability or mobility impairments due to trauma, chronic illnesses or over-  
16 weight may avoid walking and rely on wheelchairs for most daily activities. Many studies  
17 showed that wheelchair users had greater bone loss compared to walkers <sup>4,5</sup>. Physical activity is  
18 one of the recommended approaches for preventing osteoporosis. However, some older adults  
19 may be restricted from exercise training because they are not physically fit to perform the  
20 intensive exercise <sup>6</sup>, leading to a vicious cycle of musculoskeletal deterioration.

1  
2  
3 1 Low-magnitude high-frequency vibration (LMHFV) is a promising intervention proposed as an  
4  
5 2 alternative to physical exercise<sup>7</sup> for treating osteoporosis. It is a non-invasive biophysical  
6  
7 3 intervention that provides systemic vertical vibrations at 20 - 90Hz at amplitude of less than 1.0g  
8  
9 4 (g = gravitational acceleration)<sup>8</sup>. Previous studies demonstrated that LMHFV treatment could  
10  
11 5 enhance muscle strength<sup>6</sup>, postural control<sup>9</sup>, balancing ability<sup>6 10 11</sup>, new bone formation<sup>12-14</sup>,  
12  
13 6 spinal BMD<sup>6</sup>, and blood circulation<sup>6</sup>.

14  
15  
16  
17 7 There were some studies reporting the effect of whole-body vibration treatment on wheelchair  
18  
19 8 users with spinal cord injury. They showed that whole-body vibration treatment could increase  
20  
21 9 upper limb performance during propulsion of the wheelchairs in terms of average speed, time of  
22  
23 10 displacement and blood flow to paralyzed muscles in the lower limbs<sup>15-17</sup>. However, there is a  
24  
25 11 lack of evidence for the effect of LMHFV on older adults with poor walking and standing ability  
26  
27 12 (such as non-paralyzed wheelchair users), which is a missing gap of our knowledge.

28  
29  
30  
31  
32 13 In this study, we hypothesize that LMHFV would enhance the musculoskeletal health of the  
33  
34 14 older adults with walking difficulties and relying on wheelchairs for daily mobility, in terms of  
35  
36 15 vertebral bone quality and muscle performance. The objective is to investigate the effects of  
37  
38 16 LMHFV on vertebral BMD, muscle performance and balancing ability in disabled older  
39  
40 17 participants. The vibration platform will be modified to suit the disabled patients for treatment at  
41  
42 18 sitting position. The results of this study would broaden the indications of vibration platform to  
43  
44 19 benefit more people in the community, which have a good potential of translation.  
45  
46  
47  
48  
49  
50

## 51 **METHODS**

### 52 *Study design*

1 This is a single-blinded randomized controlled trial to study the effects of LMHV on vertebral  
2 BMD and muscle performance of disabled older adults (Figure 1). This is a two-year study, in  
3 which the recruited wheelchair users will receive a 6-month LMHFV treatment. The study  
4 protocol was approved by the Clinical Research Ethics Committee of the Chinese University of  
5 Hong Kong (Ref. no 2019.087-T), with expected start date of January 1 of 2020 and end date of  
6 October 1 of 2021.

### 7 *Study participants*

8 Participants will be recruited from the specialist outpatient clinic or orthopaedic wards of the  
9 Prince of Wales Hospital (PWH) of the Chinese University of Hong Kong, or community centers  
10 or elderly homes. Participants will be recruited based on the inclusion and exclusion criteria. All  
11 recruited participants will be requested to give a written consent and will perform the following  
12 assessments at the PWH.

### 13 *Inclusion criteria*

14 Inclusion criteria are listed as follows:

- 15 1. Participants of both genders aged  $\geq 65$  years.
- 16 2. Participants with walking difficulties, especially those who usually walk indoor but use  
17 wheelchairs outdoor.
- 18 3. Participants with good general health conditions.

### 19 *Exclusion criteria*

20 Exclusion criteria are as follows:

- 21 1. Participants cannot stand and walk independently.

- 1 2. Participants who had vibration treatment before.
- 2 3. Participants with malignancy.
- 3 4. Participants with acute fractures or severe osteoarthritis <sup>18</sup>.
- 4 5. Participants with cardiovascular concern such as with pace-maker in-situ.
- 5 6. Participants with chronic inflammatory conditions known to affect muscle metabolism such
- 6 as rheumatoid arthritis.
- 7 7. Participants with high frequency of physical activities, such as participants who participated
- 8 in regular exercise five times a week or more.

### 9 *Randomization and Grouping*

10 After eligibility screening, recruited participants will be randomized by sealed-envelope drawing  
11 of computer-generated random numbers. The random number list is kept strictly confidential and  
12 the researchers will not have access to the list. Research participants will be randomized into  
13 either one of two groups: LMHFV or control group.

### 14 *Assessments*

15 Two groups of participants will be subjected to the same assessments: [1] demographic data  
16 collection; [2] BMD measurement at the spine (primary outcome) and hip; [3] balancing ability  
17 test, [4] quality of life (QoL); and [5] adverse event reporting, if any. Compliance of the  
18 participants in LMHFV group will be recorded in an SD card in the treatment device while the  
19 participants will also be given a treatment calendar to self-record the usage for cross-validation.  
20 Adverse or fall events are recorded by a calendar provided to each participant who will be  
21 instructed to record the date and details of each event as previously reported <sup>6</sup>.

### 22 *Interventions*

1 LMHFV is a non-invasive biophysical intervention providing whole-body vibration signals for  
2 mechanical stimulation. No known side effects are associated with this treatment except when a  
3 small risk of falling during the transfer of participants from the wheelchair to the treatment  
4 device. As the benefits discussed above including muscle strength<sup>6</sup>, postural control<sup>9</sup>, balancing  
5 ability<sup>6 10 11</sup>, and blood circulation<sup>6</sup> may benefit wheelchair users' musculoskeletal health, risks  
6 of falling could be minimized with the help of the on-site researchers.

7 Participants are required to sit upright on the vibration platform (V-Health Limited, Hong Kong)  
8 providing a frequency 35 Hz, 0.3× gravitational acceleration at peak-to-peak displacement of less  
9 than 0.1 mm for 20 min/day. Treatment will be given for at least 3 days/week. In this study, the  
10 design of vibration platforms is modified for wheelchair users. A chair and a supporting footrest  
11 are fixed on the platform (Figure 2). Participants are instructed to sit on the chair and rest their  
12 feet on the footrest for 20 min/day. The research staff will instruct safety precautions and  
13 operative procedures. Each patient in the control group are instructed to maintain their habitual  
14 lifestyle without vibration treatment nor specific instructions given to take on additional physical  
15 exercise. Physical activities will be monitored via questionnaires.

### 16 *Blinding*

17 Investigators, outcome assessors and the statistician will be blinded to the grouping allocation  
18 that is performed by one independent staff and kept confidential from team members. Outcome  
19 assessments will be performed by a central technician at the Bone Quality and Health Centre of  
20 the Chinese University of Hong Kong, who has obtained International Society for Clinical  
21 Densitometry (ISCD) certificate and is independent from this project. All participants will be  
22 reminded not to disclose their grouping to the assessors. However, blinding the participants for

1 the LMHFV treatment is not feasible because the vibration signals can be easily felt and placebo  
2 is rare in vibration studies <sup>6 10</sup>.

### 3 *Primary outcome measures*

4 All primary and secondary outcome assessments for the two groups will be performed at baseline  
5 and 6 months post-treatment.

6 The primary outcome of this study is vertebral BMD. BMD will be assessed by standard DXA  
7 (Delphi W, Hologic, Waltham, MA, USA) which is a gold standard assessment for osteoporosis  
8 recommended by World Health Organization (WHO). Spine and hip are the two standard sites  
9 for the diagnosis of osteoporosis and both will be measured. In our institute, the short-term  
10 precision error of areal BMD (aBMD) by DXA was 2.07% at the femoral neck and 1.35% <sup>19</sup> at  
11 the lumbar spine.

### 12 *Secondary outcome measures*

13 Secondary outcomes include muscle strength assessment, balancing ability and quality of life  
14 (QoL).

15 Handgrip strength and quadriceps strength will be assessed. Handgrip strength will be measured  
16 by dynamometer (5030JI, JAMAR, USA) on dominant hand of each participant. Participants will  
17 be instructed to hold the device with the arm at right angle and elbow to the side of the body. The  
18 maximum effort will be taken from 3 trials <sup>20</sup>. Quadriceps strength will be measured by  
19 instructing the participants to perform an active extension of the knee joint at a sitting position  
20 with both feet free from the ground, and the hip and knee joint flexed at 90°. The peak forces of  
21 the knee extension will be measured by a dynamometer attached at the malleoli level and  
22 repeated thrice in each lower limb with the maximum force taken for analysis<sup>6</sup>.

1  
2  
3 1 To assess the balancing ability, modified functional reach test <sup>21</sup> and postural stability test will be  
4  
5 2 performed. Modified functional reach test is a simple test for fall risk assessment <sup>22</sup>. It measures  
6  
7 3 the maximal distance that the participant can reach when the participant sits on a bench with their  
8  
9 4 hip, knees, and ankles positioned at 90° of flexion, with feet positioned flat on the floor. A level  
10  
11 5 yardstick will be mounted on the wall at the height of each participant's acromion of the non-  
12  
13 6 paretic side, while sitting on bench with no back or arm rests. Participants are required to lean as  
14  
15 7 far as possible in each direction without rotating or touching the wall. The furthest position of the  
16  
17 8 fifth finger will be marked on the yardstick. If the participant cannot raise the paretic arm, the  
18  
19 9 distance covered by the acromion during leaning will be used <sup>18</sup>. Postural stability test measures  
20  
21 10 participants' ability to maintain their center of balance. Center of pressure (COP) is the average  
22  
23 11 point at which the body concentrates. COP can be tested by Biodex Balance System (Biodex  
24  
25 12 Medical Systems, Inc, NY, USA). Participants are required to sit on the platform without support  
26  
27 13 from feet and keep arms folded across chest. Thighs need to be kept parallel, with 75% of their  
28  
29 14 length supported on the platform<sup>23</sup>.

30  
31  
32  
33 15 To assess the health-related quality of life, validated Chinese version of the 36-item Short-Form  
34  
35 16 Health Survey (SF-36) will be used for quantitative evaluation of the participants' physical and  
36  
37 17 mental component summary. Participants with higher scores indicate a general better quality of  
38  
39 18 life<sup>6 24</sup>.

#### 39 *Sample size calculation*

40  
41  
42  
43 20 Vertebral BMD is used as the primary outcome in this study. Our previous bedrest study  
44  
45 21 <sup>25</sup> showed that vibration could reduce the loss of bone mineral density at various skeletal sites by  
46  
47 22 5-10%. The total sample size is estimated to be 80 participants using two-way repeated measures

1 ANOVA with power at 0.8 and alpha of 0.05. With consideration of around 15% dropout, the  
2 sample size is increased to n=80.

### 3 *Data Analysis*

4 Data in this study will be analysed according to the intention-to-treat principle followed by per-  
5 protocol analysis. Missing data will be handled using last-observation-carried-forward approach.  
6 Normality tests will be performed to determine the normal distribution of data. Two-way  
7 repeated measures ANOVA will be used for comparing the measured outcomes between two  
8 groups at different time points; chi-square tests are used to compare proportions for categorical  
9 variables. Non-parametric tests will be employed if normality assumption is violated. Additional  
10 sub-group analysis be explored and stratified by gender, BMI, and age. SPSS version 25.0  
11 (IBM, NY, USA) will be used to perform analysis and significance level is set at  $p < 0.05$ .

### 12 *Data monitoring*

13 All investigators will be responsible for record keeping. Only principle and co-investigators,  
14 authorized research personnel and Ethical Committee can access to the personal data during and  
15 after the study. All data collection will be performed with strict adherence to the professional  
16 standards of confidentiality. Any personal information, including participants' name, address,  
17 phone number etc, will be removed from all records. Important documents will be retained for at  
18 least 3 years after the completion of the study for final report and inspection.

### 19 *Data Statement*

20 Data and resources will be shared with other eligible investigators through academically  
21 established means. The protocol and datasets used or analysed in this study will be available



1 from the corresponding author upon reasonable request. Researchers who provide a  
2 methodologically sound proposal may access data to achieve aims in the approved proposal.

### 3 *Patient and public involvement*

4 Patients and the public were not involved in the design or planning of the study. Members of the  
5 public are involved in the recruitment of participants or conduct of the study. We will report test  
6 results to participants in plain language after their end-point assessments are completed. Results  
7 will be available to the public and patients in the forms of educational talks and booklets or  
8 flyers and published in open access peer-reviewed journals.

### 9 *Ethics and dissemination*

10 LMHFV is a non-invasive intervention and reported to have no serious adverse effect<sup>6</sup>. The only  
11 ethical concern is the additional DXA assessments, which emits a low-dose radiation at 10  
12 microSv, roughly equivalent to 1 day exposure to natural background radiation.

## 14 **DISCUSSION**

15 To our knowledge, this is the first study to investigate the efficacy of low-magnitude high-  
16 frequency vibration therapy (LMHFV) on wheelchair users. As the worldwide ageing  
17 population escalates, the number of people with mobility impairment or disability would also  
18 increase<sup>26</sup>. These people would inevitably be relying on wheelchair to assist their daily living<sup>27</sup>.  
19 Wheelchair-bound elderly usually have limited physical activity and is therefore associated to  
20 lower BMD<sup>28</sup> and ability to control body position, and thus have an increased risk of fall and  
21 osteoporotic fractures. A study from Grant Medical Center in the United States investigated 30

1 wheelchair-bound participants who fell from wheelchair over a 5 years period<sup>29</sup>. The report  
2 showed that elderlies who were older than 65 years of age with higher fall risk were associated  
3 with lack of physical activity and poor nutrition, leading to a decrease in muscle mass and  
4 strength. As most osteoporotic fractures are caused by combination of poor balance, falls, and  
5 deteriorating bone strength. Therefore, LMHFV is the proposed strategy to target  
6 musculoskeletal deterioration in wheelchair users for the prevention of more detrimental  
7 consequences.

8 LMHFV has previously been reported to have positive effects on reducing fall and fracture risks,  
9 enhancing muscle strength and improving balancing ability in healthy community-dwelling older  
10 people<sup>6 30</sup>. Supported with this evidence, it is therefore hypothesized that LMHFV would  
11 provide positive effects on the musculoskeletal health and physical performance in terms of  
12 BMD, muscle strength, balancing ability on elderlies with disability or mobility impairments  
13 who rely on wheelchairs for locomotion.

14 Vibration is a good treatment modality that is easy to implement for physically challenged  
15 patients, like wheelchair users. However, there is a scarce of literature reporting its effect on this  
16 group of patients who are most desperately in need of the treatment. There have been a few  
17 reports on the application of vibration treatment on wheelchair users with spinal cord injury  
18 (SCI). Menéndez's study reported in 2016 investigated the acute effect of whole-body vibration  
19<sup>17</sup>. Ten patients with SCI were recruited and treated with various treatment schemes including the  
20 whole-body vibration (WBV). Patients were instructed to sit on wheelchairs with their feet rested  
21 on the vibration platform (Galileo Home, Galileo, Novotec, Germany, 10 Hz, 5 mm peak-to-  
22 peak). Their results have shown an enhancement to the mean blood velocity (MBV) and peak  
23 blood velocity (PBV) by approximately 25% at 7 minutes after a 1-minute vibration treatment. A

1  
2  
3 1 separate study in 2016, also by Menéndez's group, investigated the long-term combined  
4  
5 2 treatment effect of WBV and electromyostimulatin (ES) in SCI patients. Seventeen participants  
6  
7 3 with SCI were randomized into treatment group and control group for 12 weeks. Patients in  
8  
9 4 treatment group received 30 sections of 10-minute WBV and ES stimulation over a 12-week  
10  
11 5 period <sup>16</sup>. The treatment group was reported to show increased resting arterial diameter,  
12  
13 6 increased blood flow, and increased muscle thickness at the gastrocnemius after 12 weeks of  
14  
15 7 treatment. Although these studies employed a side-alternating vibration (instead of vertical-  
16  
17 8 oscillating vibration) only to the lower limbs, these results suggested that mechanical stimulation  
18  
19 9 in the form of vibration could provide benefits to blood flow that is associated with better  
20  
21 10 performance-related outcomes in paralyzed skeletal muscles. Therefore, suggesting that the  
22  
23 11 proposed LMHFV treatment, providing a vertical oscillating stimulation (Figure 1) to the whole-  
24  
25 12 body would be beneficial to the target group of patients.

26  
27  
28  
29  
30  
31 13 Findings of the current clinical trial would generate valuable data that is of high clinical  
32  
33 14 translation values for wider application of vibration therapy in the community; and to generate  
34  
35 15 clinical evidence that is not restricted to the healthy and mobile older people, but also to the  
36  
37 16 group of patients with mobility impairments and high risk of further musculoskeletal function  
38  
39 17 deterioration. Although the study only investigates the a treatment period of 6-months due to  
40  
41 18 limited research resources, a longer or sustained use of the vibration treatment may be observed  
42  
43 19 as suggested by our previous study that beneficial effects on healthy older adults are maintained  
44  
45 20 even after 12-months of treatment cessation <sup>30</sup>.

46  
47  
48  
49  
50  
51 21  
52  
53 22 **DECLARATION**

1  
2  
3 1 Acknowledgements: This study was supported by Project Impact Enhancement Fund (Ref:  
4  
5 2 PIEF/U3/01) and Evidence-Based Orthopaedics Clinical Education and Research Program  
6  
7 3 (EBO) of the Chinese University of Hong Kong; V-health Limited for lending and modifications  
8  
9 4 the vibration platforms used for this study. The authors declare no conflict of interest.  
10  
11  
12

### 13 **TRAIL STATUS**

14  
15  
16 6 This trial is in process of planning participant recruitment.  
17  
18

### 19 **ACKNOWLEDGEMENTS**

20  
21  
22 8 We would like to thank all the colleagues in the Fall Prevention Team and the Bone Quality and  
23  
24 9 Health Centre of the Department of Orthopaedics and Traumatology, Faculty of Medicine, The  
25  
26 10 Chinese University of Hong Kong for their support and help in this work and all the subjects for  
27  
28 11 their participation in this study.  
29  
30

### 31 **FUNDING**

32  
33  
34  
35 13 This study was supported by Project Impact Enhancement Fund (Ref: PIEF/U3/01) and  
36  
37 14 Evidence-Based Orthopaedics Clinical Education and Research Program (EBO) of the Chinese  
38  
39 15 University of Hong Kong; V-health Limited for lending and modifications the vibration  
40  
41 16 platforms used for this study.  
42  
43  
44

### 45 **AUTHOR CONTRIBUTIONS**

46  
47  
48 18 SKHC, YNC, RMYW, WHC conceptualized the study; SKHC, YNC, CYH drafted the  
49  
50 19 manuscript; CYH, HWW execute the research project and data collection. All authors reviewed  
51  
52 20 and approved the final manuscript.  
53  
54

### 55 **ETHICS APPROVAL**

1 The study protocol was approved by the Clinical Research Ethics Committee of the Chinese  
2 University of Hong Kong (Ref. no 2019.087-T) and conformed to the Declaration of Helsinki.  
3 Results will be disseminated through peer-reviewed publications, conferences and workshops.

#### 4 **CONSENT FOR PUBLICATION**

5 Not applicable.

#### 6 **ABBREVIATIONS**

7 Low-magnitude high-frequency vibration (LMHFV)  
8 Bone mineral density (BMD)  
9 Areal BMD (aBMD)  
10 X-ray absorptiometry (DXA)  
11 Quality of life (QoL)  
12 International Society for Clinical Densitometry (ISCD)  
13 World Health Organization (WHO)  
14 Center of pressure (COP)  
15 36-item Short-Form Health Survey (SF-36)  
16 Spinal cord injury (SCI)  
17 Whole-body vibration (WBV)  
18 Mean blood velocity (MBV)  
19 Peak blood velocity (PBV)  
20 Electromyostimulatin (ES)

1  
2  
3  
4  
5  
6  
7  
8  
9  
10  
11  
12  
13  
14  
15  
16  
17  
18  
19  
20  
21  
22  
23  
24  
25  
26  
27  
28  
29  
30  
31  
32  
33  
34  
35  
36  
37  
38  
39  
40  
41  
42  
43  
44  
45  
46  
47  
48  
49  
50  
51  
52  
53  
54  
55  
56  
57  
58  
59  
60  

## 1 REFERENCES

1. Wong RMY, Choy MHV, Li MCM, et al. A systematic review of current osteoporotic metaphyseal fracture animal models. *Bone Joint Res* 2018;7(1):6-11. doi: 10.1302/2046-3758.71.BJR-2016-0334.R2 [published Online First: 2018/01/07]
2. Cole HA, Ohba T, Nyman JS, et al. Fibrin accumulation secondary to loss of plasmin-mediated fibrinolysis drives inflammatory osteoporosis in mice. *Arthritis Rheumatol* 2014;66(8):2222-33. doi: 10.1002/art.38639 [published Online First: 2014/03/26]
3. Chung SL, Leung KS, Cheung WH. Low-magnitude high-frequency vibration enhances gene expression related to callus formation, mineralization and remodeling during osteoporotic fracture healing in rats. *J Orthop Res* 2014;32(12):1572-9. doi: 10.1002/jor.22715 [published Online First: 2014/08/19]
4. Gebara OC, Mittleman MA, Sutherland P, et al. Association between increased estrogen status and increased fibrinolytic potential in the Framingham Offspring Study. *Circulation* 1995;91(7):1952-8. doi: 10.1161/01.cir.91.7.1952 [published Online First: 1995/04/01]
5. Lindoff C, Petersson F, Lecander I, et al. Passage of the menopause is followed by haemostatic changes. *Maturitas* 1993;17(1):17-22. doi: 10.1016/0378-5122(93)90119-3 [published Online First: 1993/07/01]
6. Leung KS, Li CY, Tse YK, et al. Effects of 18-month low-magnitude high-frequency vibration on fall rate and fracture risks in 710 community elderly--a cluster-randomized controlled trial. *Osteoporos Int* 2014;25(6):1785-95. doi: 10.1007/s00198-014-2693-6 [published Online First: 2014/03/29]
7. Ghazalian F, Hakemi L, Pourkazemi L, et al. Effects of whole-body vibration training on fibrinolytic and coagulative factors in healthy young men. *J Res Med Sci* 2014;19(10):982-6. [published Online First: 2014/12/30]
8. Wang J, Leung KS, Chow SK, et al. The effect of whole body vibration on fracture healing - a systematic review. *European cells & materials* 2017;34:108-27. doi: 10.22203/eCM.v034a08 [published Online First: 2017/09/08]
9. Rogan S, Hilfiker R, Herren K, et al. Effects of whole-body vibration on postural control in elderly: a systematic review and meta-analysis. *BMC geriatrics* 2011;11:72. doi: 10.1186/1471-2318-11-72 [published Online First: 2011/11/08]
10. Cheung WH, Mok HW, Qin L, et al. High-frequency whole-body vibration improves balancing ability in elderly women. *Arch Phys Med Rehabil* 2007;88(7):852-7. doi: 10.1016/j.apmr.2007.03.028 [published Online First: 2007/07/03]
11. Torvinen S, Kannus P, Sievanen H, et al. Effect of 8-month vertical whole body vibration on bone, muscle performance, and body balance: a randomized controlled study. *J Bone Miner Res* 2003;18(5):876-84. doi: 10.1359/jbmr.2003.18.5.876 [published Online First: 2003/05/08]
12. Rubin C, Recker R, Cullen D, et al. Prevention of postmenopausal bone loss by a low-magnitude, high-frequency mechanical stimuli: a clinical trial assessing compliance, efficacy, and safety. *J Bone Miner Res* 2004;19(3):343-51. doi: 10.1359/JBMR.0301251 [published Online First: 2004/03/26]
13. Verschueren SM, Roelants M, Delecluse C, et al. Effect of 6-month whole body vibration training on hip density, muscle strength, and postural control in postmenopausal women: a randomized controlled pilot study. *J Bone Miner Res* 2004;19(3):352-9. doi: 10.1359/JBMR.0301245 [published Online First: 2004/03/26]

14. Ogborn DI, Gardiner PF. Effects of exercise and muscle type on BDNF, NT-4/5, and TrKB expression in skeletal muscle. *Muscle & nerve* 2010;41(3):385-91. doi: 10.1002/mus.21503 [published Online First: 2009/10/09]
15. Wang X, Luo Y, Masci PP, et al. Influence of Interleukin-1 Beta on Platelet-Poor Plasma Clot Formation: A Potential Impact on Early Bone Healing. *PLoS One* 2016;11(2):e0149775. doi: 10.1371/journal.pone.0149775
16. Francis RM, Romeyn CL, Coughlin AM, et al. Age and aerobic training status effects on plasma and skeletal muscle tPA and PAI-1. *Eur J Appl Physiol* 2014;114(6):1229-38. doi: 10.1007/s00421-014-2857-2 [published Online First: 2014/03/08]
17. Wong RMY, Choy MHV, Li MCM, et al. A systematic review of current osteoporotic metaphyseal fracture animal models. *Bone Joint Res* 2018;7(1):6-11. doi: 10.1302/2046-3758.71.BJR-2016-0334.R2
18. Choi SJ, Shin WS, Oh BK, et al. Effect of training with whole body vibration on the sitting balance of stroke patients. *J Phys Ther Sci* 2014;26(9):1411-4. doi: 10.1589/jpts.26.1411 [published Online First: 2014/10/03]
19. Zhu TY, Hung VW, Cheung WH, et al. Value of Measuring Bone Microarchitecture in Fracture Discrimination in Older Women with Recent Hip Fracture: A Case-control Study with HR-pQCT. *Scientific reports* 2016;6:34185. doi: 10.1038/srep34185 [published Online First: 2016/09/28]
20. Wong RMY, Wong H, Zhang N, et al. The relationship between sarcopenia and fragility fracture-a systematic review. *Osteoporos Int* 2019;30(3):541-53. doi: 10.1007/s00198-018-04828-0 [published Online First: 2019/01/06]
21. Gao KL, Chan KM, Purves S, et al. Reliability of dynamic sitting balance tests and their correlations with functional mobility for wheelchair users with chronic spinal cord injury. *J Orthop Translat* 2015;3(1):44-49. doi: 10.1016/j.jot.2014.07.003 [published Online First: 2014/08/07]
22. Williams B, Allen B, Hu Z, et al. Real-Time Fall Risk Assessment Using Functional Reach Test. *Int J Telemed Appl* 2017;2017:2042974. doi: 10.1155/2017/2042974 [published Online First: 2017/02/09]
23. Ruhe A, Fejer R, Walker B. Center of pressure excursion as a measure of balance performance in patients with non-specific low back pain compared to healthy controls: a systematic review of the literature. *Eur Spine J* 2011;20(3):358-68. doi: 10.1007/s00586-010-1543-2 [published Online First: 2010/08/20]
24. Lam CL, Gandek B, Ren XS, et al. Tests of scaling assumptions and construct validity of the Chinese (HK) version of the SF-36 Health Survey. *J Clin Epidemiol* 1998;51(11):1139-47. doi: 10.1016/s0895-4356(98)00105-x [published Online First: 1998/11/17]
25. Wang H, Wan Y, Tam KF, et al. Resistive vibration exercise retards bone loss in weight-bearing skeletons during 60 days bed rest. *Osteoporos Int* 2012;23(8):2169-78. doi: 10.1007/s00198-011-1839-z [published Online First: 2011/12/14]
26. Mann W, C L, M J, et al. Frail Older Adults' Self-Report of Their Most Important Assistive Device. *OTJR Occup Part Health* 2004;24(1):4-12. doi: <http://dx.doi.org/10.1177/153944920402400102>
27. Gavin-Dreschnack D, A N, S F, et al. Wheelchair-related falls: Current evidence and directions for improved quality care. *J Nurs Care Qual* 2005;20(2):119-27. doi: <http://dx.doi.org/10.1097/00001786-200504000-00006>

- 1  
2  
3 1 28. Cavedon V, C M, F L, et al. Bone and skeletal muscle changes in oldest-old women: the role  
4 2 of physical inactivity. *Aging clinical and experimental research* 2020;32(2):207-14. doi:  
5 3 <http://dx.doi.org/10.1007/s40520-019-01352-x>  
6 4  
7 4 29. Opalek J, V G, D R. Wheelchair falls: 5 years of data from a level I trauma center. *J Trauma*  
8 5 *Nurs* 2009;16(2):98-102. doi: <http://dx.doi.org/10.1097/JTN.0b013e3181ac920e>  
9 6  
10 6 30. Cheung WH, Li CY, Zhu TY, et al. Improvement in muscle performance after one-year  
11 7 cessation of low-magnitude high-frequency vibration in community elderly. *J*  
12 8 *Musculoskelet Neuronal Interact* 2016;16(1):4-11. [published Online First: 2016/03/06]

13  
14  
15  
16 10 **FIGURE LEGEND**

17  
18  
19 11 **Figure 1** Flow diagram showing the grouping and assessments in this study.

20  
21  
22 12 **Figure 2** A vertical-oscillating vibration platform modified to provide a seating place for the  
23  
24 13 research participant to receive the 20 min/day treatment. This representative vibration platform  
25  
26 14 is installed in a community centre situated in a public housing estate with 6692 units/families in  
27  
28 15 the Shatin district of Hong Kong.





35 Flow diagram showing the grouping and assessments in this study.

36 109x96mm (300 x 300 DPI)



A vertical-oscillating vibration platform modified to provide a seating place for the research subject to receive the 20 min/day treatment. This representative vibration platform is installed in a community centre situated in a public housing estate with 6692 units/families in the Shatin district of Hong Kong.

48x67mm (300 x 300 DPI)

# Reporting checklist for protocol of a clinical trial.

Based on the SPIRIT guidelines.

## Instructions to authors

Complete this checklist by entering the page numbers from your manuscript where readers will find each of the items listed below.

Your article may not currently address all the items on the checklist. Please modify your text to include the missing information. If you are certain that an item does not apply, please write "n/a" and provide a short explanation.

Upload your completed checklist as an extra file when you submit to a journal.

In your methods section, say that you used the SPIRIT reporting guidelines, and cite them as:

Chan A-W, Tetzlaff JM, Altman DG, Laupacis A, Gøtzsche PC, Krleža-Jerić K, Hróbjartsson A, Mann H, Dickersin K, Berlin J, Doré C, Parulekar W, Summerskill W, Groves T, Schulz K, Sox H, Rockhold FW, Rennie D, Moher D. SPIRIT 2013 Statement: Defining standard protocol items for clinical trials. *Ann Intern Med.* 2013;158(3):200-207

|                                   |                                                                                                                                 |  | Page   |
|-----------------------------------|---------------------------------------------------------------------------------------------------------------------------------|--|--------|
|                                   | Reporting Item                                                                                                                  |  | Number |
| <b>Administrative information</b> |                                                                                                                                 |  |        |
| Title                             | <a href="#">#1</a> Descriptive title identifying the study design, population, interventions, and, if applicable, trial acronym |  | 1      |

|                                                                                  |                                                                  |                     |                                                                                                                                                                                                                                                                                          |                       |
|----------------------------------------------------------------------------------|------------------------------------------------------------------|---------------------|------------------------------------------------------------------------------------------------------------------------------------------------------------------------------------------------------------------------------------------------------------------------------------------|-----------------------|
| 1<br>2<br>3<br>4<br>5                                                            | Trial registration                                               | <a href="#">#2a</a> | Trial identifier and registry name. If not yet registered, name of intended registry                                                                                                                                                                                                     | 3                     |
| 6<br>7<br>8<br>9<br>10                                                           | Trial registration:<br>data set                                  | <a href="#">#2b</a> | All items from the World Health Organization Trial Registration Data Set                                                                                                                                                                                                                 | See this<br>checklist |
| 11<br>12<br>13                                                                   | Protocol version                                                 | <a href="#">#3</a>  | Date and version identifier                                                                                                                                                                                                                                                              | n/a                   |
| 14<br>15<br>16<br>17<br>18<br>19                                                 | Funding                                                          | <a href="#">#4</a>  | Sources and types of financial, material, and other support                                                                                                                                                                                                                              | 14                    |
| 20<br>21<br>22<br>23<br>24<br>25<br>26<br>27                                     | Roles and<br>responsibilities:<br>contributorship                | <a href="#">#5a</a> | Names, affiliations, and roles of protocol contributors                                                                                                                                                                                                                                  | n/a                   |
| 28<br>29<br>30<br>31<br>32<br>33<br>34<br>35<br>36<br>37                         | Roles and<br>responsibilities:<br>sponsor contact<br>information | <a href="#">#5b</a> | Name and contact information for the trial sponsor                                                                                                                                                                                                                                       | n/a                   |
| 38<br>39<br>40<br>41<br>42<br>43<br>44<br>45<br>46<br>47<br>48<br>49<br>50<br>51 | Roles and<br>responsibilities:<br>sponsor and funder             | <a href="#">#5c</a> | Role of study sponsor and funders, if any, in study design; collection, management, analysis, and interpretation of data; writing of the report; and the decision to submit the report for publication, including whether they will have ultimate authority over any of these activities | n/a                   |
| 52<br>53<br>54<br>55<br>56<br>57<br>58<br>59<br>60                               | Roles and<br>responsibilities:<br>committees                     | <a href="#">#5d</a> | Composition, roles, and responsibilities of the coordinating centre, steering committee, endpoint adjudication committee, data management team, and                                                                                                                                      | n/a                   |

other individuals or groups overseeing the trial, if applicable (see Item 21a for data monitoring committee)

## Introduction

Background and rationale [#6a](#) Description of research question and justification for undertaking the trial, including summary of relevant studies (published and unpublished) examining benefits

and harms for each intervention

Background and rationale: choice of comparators [#6b](#) Explanation for choice of comparators

Objectives [#7](#) Specific objectives or hypotheses

Trial design [#8](#) Description of trial design including type of trial (eg, parallel group, crossover, factorial, single group), allocation ratio, and framework (eg, superiority, equivalence, non-inferiority, exploratory)

## Methods:

Participants, interventions, and outcomes

Study setting [#9](#) Description of study settings (eg, community clinic, academic hospital) and list of countries where data will be collected. Reference to where list of study sites can be obtained

|    |                      |                      |                                                              |      |
|----|----------------------|----------------------|--------------------------------------------------------------|------|
| 1  | Eligibility criteria | <a href="#">#10</a>  | Inclusion and exclusion criteria for participants. If        | 6    |
| 2  |                      |                      |                                                              |      |
| 3  |                      |                      |                                                              |      |
| 4  |                      |                      | applicable, eligibility criteria for study centres and       |      |
| 5  |                      |                      |                                                              |      |
| 6  |                      |                      | individuals who will perform the interventions (eg,          |      |
| 7  |                      |                      |                                                              |      |
| 8  |                      |                      | surgeons, psychotherapists)                                  |      |
| 9  |                      |                      |                                                              |      |
| 10 |                      |                      |                                                              |      |
| 11 | Interventions:       | <a href="#">#11a</a> | Interventions for each group with sufficient detail to allow | 7-8  |
| 12 |                      |                      |                                                              |      |
| 13 | description          |                      | replication, including how and when they will be             |      |
| 14 |                      |                      |                                                              |      |
| 15 |                      |                      |                                                              |      |
| 16 |                      |                      | administered                                                 |      |
| 17 |                      |                      |                                                              |      |
| 18 |                      |                      |                                                              |      |
| 19 | Interventions:       | <a href="#">#11b</a> | Criteria for discontinuing or modifying allocated            | n/a  |
| 20 |                      |                      |                                                              |      |
| 21 | modifications        |                      | interventions for a given trial participant (eg, drug dose   |      |
| 22 |                      |                      |                                                              |      |
| 23 |                      |                      | change in response to harms, participant request, or         |      |
| 24 |                      |                      |                                                              |      |
| 25 |                      |                      | improving / worsening disease)                               |      |
| 26 |                      |                      |                                                              |      |
| 27 |                      |                      |                                                              |      |
| 28 |                      |                      |                                                              |      |
| 29 | Interventions:       | <a href="#">#11c</a> | Strategies to improve adherence to intervention              | 7    |
| 30 |                      |                      |                                                              |      |
| 31 | adherence            |                      | protocols, and any procedures for monitoring adherence       |      |
| 32 |                      |                      |                                                              |      |
| 33 |                      |                      | (eg, drug tablet return; laboratory tests)                   |      |
| 34 |                      |                      |                                                              |      |
| 35 |                      |                      |                                                              |      |
| 36 | Interventions:       | <a href="#">#11d</a> | Relevant concomitant care and interventions that are         | n/a  |
| 37 |                      |                      |                                                              |      |
| 38 | concomitant care     |                      | permitted or prohibited during the trial                     |      |
| 39 |                      |                      |                                                              |      |
| 40 |                      |                      |                                                              |      |
| 41 |                      |                      |                                                              |      |
| 42 | Outcomes             | <a href="#">#12</a>  | Primary, secondary, and other outcomes, including the        | 8-10 |
| 43 |                      |                      |                                                              |      |
| 44 |                      |                      | specific measurement variable (eg, systolic blood            |      |
| 45 |                      |                      |                                                              |      |
| 46 |                      |                      | pressure), analysis metric (eg, change from baseline,        |      |
| 47 |                      |                      |                                                              |      |
| 48 |                      |                      | final value, time to event), method of aggregation (eg,      |      |
| 49 |                      |                      |                                                              |      |
| 50 |                      |                      | median, proportion), and time point for each outcome.        |      |
| 51 |                      |                      |                                                              |      |
| 52 |                      |                      |                                                              |      |
| 53 |                      |                      | Explanation of the clinical relevance of chosen efficacy     |      |
| 54 |                      |                      |                                                              |      |
| 55 |                      |                      | and harm outcomes is strongly recommended                    |      |
| 56 |                      |                      |                                                              |      |
| 57 |                      |                      |                                                              |      |
| 58 |                      |                      |                                                              |      |
| 59 |                      |                      |                                                              |      |
| 60 |                      |                      |                                                              |      |

|    |                           |                      |                                                           |          |
|----|---------------------------|----------------------|-----------------------------------------------------------|----------|
| 1  | Participant timeline      | <a href="#">#13</a>  | Time schedule of enrolment, interventions (including any  | 5-7;     |
| 2  |                           |                      | run-ins and washouts), assessments, and visits for        | Figure 2 |
| 3  |                           |                      | participants. A schematic diagram is highly               |          |
| 4  |                           |                      | recommended (see Figure)                                  |          |
| 5  |                           |                      |                                                           |          |
| 6  |                           |                      |                                                           |          |
| 7  |                           |                      |                                                           |          |
| 8  |                           |                      |                                                           |          |
| 9  |                           |                      |                                                           |          |
| 10 |                           |                      |                                                           |          |
| 11 | Sample size               | <a href="#">#14</a>  | Estimated number of participants needed to achieve        | 10       |
| 12 |                           |                      | study objectives and how it was determined, including     |          |
| 13 |                           |                      | clinical and statistical assumptions supporting any       |          |
| 14 |                           |                      | sample size calculations                                  |          |
| 15 |                           |                      |                                                           |          |
| 16 |                           |                      |                                                           |          |
| 17 |                           |                      |                                                           |          |
| 18 |                           |                      |                                                           |          |
| 19 |                           |                      |                                                           |          |
| 20 |                           |                      |                                                           |          |
| 21 | Recruitment               | <a href="#">#15</a>  | Strategies for achieving adequate participant enrolment   | 10       |
| 22 |                           |                      | to reach target sample size                               |          |
| 23 |                           |                      |                                                           |          |
| 24 |                           |                      |                                                           |          |
| 25 |                           |                      |                                                           |          |
| 26 | <b>Methods:</b>           |                      |                                                           |          |
| 27 |                           |                      |                                                           |          |
| 28 | <b>Assignment of</b>      |                      |                                                           |          |
| 29 | <b>interventions (for</b> |                      |                                                           |          |
| 30 | <b>controlled trials)</b> |                      |                                                           |          |
| 31 |                           |                      |                                                           |          |
| 32 |                           |                      |                                                           |          |
| 33 |                           |                      |                                                           |          |
| 34 |                           |                      |                                                           |          |
| 35 |                           |                      |                                                           |          |
| 36 | Allocation: sequence      | <a href="#">#16a</a> | Method of generating the allocation sequence (eg,         | 7        |
| 37 | generation                |                      | computer-generated random numbers), and list of any       |          |
| 38 |                           |                      | factors for stratification. To reduce predictability of a |          |
| 39 |                           |                      | random sequence, details of any planned restriction (eg,  |          |
| 40 |                           |                      | blocking) should be provided in a separate document       |          |
| 41 |                           |                      | that is unavailable to those who enrol participants or    |          |
| 42 |                           |                      | assign interventions                                      |          |
| 43 |                           |                      |                                                           |          |
| 44 |                           |                      |                                                           |          |
| 45 |                           |                      |                                                           |          |
| 46 |                           |                      |                                                           |          |
| 47 |                           |                      |                                                           |          |
| 48 |                           |                      |                                                           |          |
| 49 |                           |                      |                                                           |          |
| 50 |                           |                      |                                                           |          |
| 51 |                           |                      |                                                           |          |
| 52 |                           |                      |                                                           |          |
| 53 | Allocation                | <a href="#">#16b</a> | Mechanism of implementing the allocation sequence (eg,    | 7        |
| 54 | concealment               |                      | central telephone; sequentially numbered, opaque,         |          |
| 55 |                           |                      |                                                           |          |
| 56 |                           |                      |                                                           |          |
| 57 |                           |                      |                                                           |          |
| 58 | mechanism                 |                      |                                                           |          |
| 59 |                           |                      |                                                           |          |
| 60 |                           |                      |                                                           |          |

sealed envelopes), describing any steps to conceal the sequence until interventions are assigned

|    |                        |                      |                                                             |
|----|------------------------|----------------------|-------------------------------------------------------------|
| 1  |                        |                      |                                                             |
| 2  |                        |                      |                                                             |
| 3  |                        |                      |                                                             |
| 4  |                        |                      |                                                             |
| 5  |                        |                      |                                                             |
| 6  | Allocation:            | <a href="#">#16c</a> | Who will generate the allocation sequence, who will         |
| 7  |                        |                      |                                                             |
| 8  | implementation         |                      | enrol participants, and who will assign participants to     |
| 9  |                        |                      | interventions                                               |
| 10 |                        |                      |                                                             |
| 11 |                        |                      |                                                             |
| 12 |                        |                      |                                                             |
| 13 | Blinding (masking)     | <a href="#">#17a</a> | Who will be blinded after assignment to interventions       |
| 14 |                        |                      |                                                             |
| 15 |                        |                      | (eg, trial participants, care providers, outcome            |
| 16 |                        |                      | assessors, data analysts), and how                          |
| 17 |                        |                      |                                                             |
| 18 |                        |                      |                                                             |
| 19 |                        |                      |                                                             |
| 20 |                        |                      |                                                             |
| 21 | Blinding (masking):    | <a href="#">#17b</a> | If blinded, circumstances under which unblinding is         |
| 22 |                        |                      |                                                             |
| 23 | emergency              |                      | permissible, and procedure for revealing a participant's    |
| 24 |                        |                      | allocated intervention during the trial                     |
| 25 | unblinding             |                      |                                                             |
| 26 |                        |                      |                                                             |
| 27 |                        |                      |                                                             |
| 28 |                        |                      |                                                             |
| 29 | <b>Methods: Data</b>   |                      |                                                             |
| 30 |                        |                      |                                                             |
| 31 | <b>collection,</b>     |                      |                                                             |
| 32 |                        |                      |                                                             |
| 33 | <b>management, and</b> |                      |                                                             |
| 34 |                        |                      |                                                             |
| 35 | <b>analysis</b>        |                      |                                                             |
| 36 |                        |                      |                                                             |
| 37 |                        |                      |                                                             |
| 38 |                        |                      |                                                             |
| 39 | Data collection plan   | <a href="#">#18a</a> | Plans for assessment and collection of outcome,             |
| 40 |                        |                      |                                                             |
| 41 |                        |                      | baseline, and other trial data, including any related       |
| 42 |                        |                      | processes to promote data quality (eg, duplicate            |
| 43 |                        |                      | measurements, training of assessors) and a description      |
| 44 |                        |                      | of study instruments (eg, questionnaires, laboratory        |
| 45 |                        |                      | tests) along with their reliability and validity, if known. |
| 46 |                        |                      |                                                             |
| 47 |                        |                      | Reference to where data collection forms can be found,      |
| 48 |                        |                      |                                                             |
| 49 |                        |                      | if not in the protocol                                      |
| 50 |                        |                      |                                                             |
| 51 |                        |                      |                                                             |
| 52 |                        |                      |                                                             |
| 53 |                        |                      |                                                             |
| 54 |                        |                      |                                                             |
| 55 |                        |                      |                                                             |
| 56 |                        |                      |                                                             |
| 57 |                        |                      |                                                             |
| 58 |                        |                      |                                                             |
| 59 |                        |                      |                                                             |
| 60 |                        |                      |                                                             |



|    |                            |                      |                                                             |         |
|----|----------------------------|----------------------|-------------------------------------------------------------|---------|
| 1  | Data collection plan:      | <a href="#">#18b</a> | Plans to promote participant retention and complete         | 7       |
| 2  |                            |                      |                                                             |         |
| 3  | retention                  |                      | follow-up, including list of any outcome data to be         |         |
| 4  |                            |                      | collected for participants who discontinue or deviate from  |         |
| 5  |                            |                      | intervention protocols                                      |         |
| 6  |                            |                      |                                                             |         |
| 7  |                            |                      |                                                             |         |
| 8  |                            |                      |                                                             |         |
| 9  |                            |                      |                                                             |         |
| 10 |                            |                      |                                                             |         |
| 11 | Data management            | <a href="#">#19</a>  | Plans for data entry, coding, security, and storage,        | 11      |
| 12 |                            |                      | including any related processes to promote data quality     |         |
| 13 |                            |                      | (eg, double data entry; range checks for data values).      |         |
| 14 |                            |                      | Reference to where details of data management               |         |
| 15 |                            |                      | procedures can be found, if not in the protocol             |         |
| 16 |                            |                      |                                                             |         |
| 17 |                            |                      |                                                             |         |
| 18 |                            |                      |                                                             |         |
| 19 |                            |                      |                                                             |         |
| 20 |                            |                      |                                                             |         |
| 21 |                            |                      |                                                             |         |
| 22 |                            |                      |                                                             |         |
| 23 | Statistics: outcomes       | <a href="#">#20a</a> | Statistical methods for analysing primary and secondary     | 10-11   |
| 24 |                            |                      | outcomes. Reference to where other details of the           |         |
| 25 |                            |                      | statistical analysis plan can be found, if not in the       |         |
| 26 |                            |                      | protocol                                                    |         |
| 27 |                            |                      |                                                             |         |
| 28 |                            |                      |                                                             |         |
| 29 |                            |                      |                                                             |         |
| 30 |                            |                      |                                                             |         |
| 31 |                            |                      |                                                             |         |
| 32 |                            |                      |                                                             |         |
| 33 | Statistics: additional     | <a href="#">#20b</a> | Methods for any additional analyses (eg, subgroup and       | n/a     |
| 34 | analyses                   |                      | adjusted analyses)                                          |         |
| 35 |                            |                      |                                                             |         |
| 36 |                            |                      |                                                             |         |
| 37 |                            |                      |                                                             |         |
| 38 | Statistics: analysis       | <a href="#">#20c</a> | Definition of analysis population relating to protocol non- | n/a     |
| 39 | population and             |                      | adherence (eg, as randomised analysis), and any             |         |
| 40 | missing data               |                      | statistical methods to handle missing data (eg, multiple    |         |
| 41 |                            |                      | imputation)                                                 |         |
| 42 |                            |                      |                                                             |         |
| 43 |                            |                      |                                                             |         |
| 44 |                            |                      |                                                             |         |
| 45 |                            |                      |                                                             |         |
| 46 |                            |                      |                                                             |         |
| 47 |                            |                      |                                                             |         |
| 48 | <b>Methods: Monitoring</b> |                      |                                                             |         |
| 49 |                            |                      |                                                             |         |
| 50 |                            |                      |                                                             |         |
| 51 | Data monitoring:           | <a href="#">#21a</a> | Composition of data monitoring committee (DMC);             | See     |
| 52 | formal committee           |                      | summary of its role and reporting structure; statement of   | comment |
| 53 |                            |                      | whether it is independent from the sponsor and              |         |
| 54 |                            |                      |                                                             |         |
| 55 |                            |                      |                                                             |         |
| 56 |                            |                      |                                                             |         |
| 57 |                            |                      |                                                             |         |
| 58 |                            |                      |                                                             |         |
| 59 |                            |                      |                                                             |         |
| 60 |                            |                      |                                                             |         |

1 competing interests; and reference to where further  
 2 details about its charter can be found, if not in the  
 3 protocol. Alternatively, an explanation of why a DMC is  
 4 not needed  
 5  
 6  
 7  
 8  
 9

10 *(DMC is unlikely to have the opportunity to make a*  
 11 *difference in this short term study where patient follow up*  
 12 *is only 6 months and this study has minimal patient risk)*  
 13  
 14  
 15  
 16  
 17  
 18  
 19  
 20

|                                                 |                      |                                                                                                                                                                                                        |     |
|-------------------------------------------------|----------------------|--------------------------------------------------------------------------------------------------------------------------------------------------------------------------------------------------------|-----|
| 21 Data monitoring:<br>22 interim analysis      | <a href="#">#21b</a> | 23 Description of any interim analyses and stopping<br>24 guidelines, including who will have access to these<br>25 interim results and make the final decision to terminate<br>26 the trial           | n/a |
| 31 Harms                                        | <a href="#">#22</a>  | 32 Plans for collecting, assessing, reporting, and managing<br>33 solicited and spontaneously reported adverse events<br>34 and other unintended effects of trial interventions or trial<br>35 conduct | 10  |
| 41 Auditing                                     | <a href="#">#23</a>  | 42 Frequency and procedures for auditing trial conduct, if<br>43 any, and whether the process will be independent from<br>44 investigators and the sponsor                                             | n/a |
| 48 <b>Ethics and</b><br>49 <b>dissemination</b> |                      |                                                                                                                                                                                                        |     |
| 54 Research ethics<br>55 approval               | <a href="#">#24</a>  | 56 Plans for seeking research ethics committee /<br>57 institutional review board (REC / IRB) approval                                                                                                 | 15  |

|    |                    |                      |                                                                |     |
|----|--------------------|----------------------|----------------------------------------------------------------|-----|
| 1  | Protocol           | <a href="#">#25</a>  | Plans for communicating important protocol                     | n/a |
| 2  |                    |                      |                                                                |     |
| 3  | amendments         |                      | modifications (eg, changes to eligibility criteria,            |     |
| 4  |                    |                      | outcomes, analyses) to relevant parties (eg,                   |     |
| 5  |                    |                      | investigators, REC / IRBs, trial participants, trial           |     |
| 6  |                    |                      | registries, journals, regulators)                              |     |
| 7  |                    |                      |                                                                |     |
| 8  |                    |                      |                                                                |     |
| 9  |                    |                      |                                                                |     |
| 10 |                    |                      |                                                                |     |
| 11 |                    |                      |                                                                |     |
| 12 |                    |                      |                                                                |     |
| 13 | Consent or assent  | <a href="#">#26a</a> | Who will obtain informed consent or assent from                | 6   |
| 14 |                    |                      | potential trial participants or authorised surrogates, and     |     |
| 15 |                    |                      | how (see Item 32)                                              |     |
| 16 |                    |                      |                                                                |     |
| 17 |                    |                      |                                                                |     |
| 18 |                    |                      |                                                                |     |
| 19 |                    |                      |                                                                |     |
| 20 |                    |                      |                                                                |     |
| 21 | Consent or assent: | <a href="#">#26b</a> | Additional consent provisions for collection and use of        | n/a |
| 22 | ancillary studies  |                      | participant data and biological specimens in ancillary         |     |
| 23 |                    |                      | studies, if applicable                                         |     |
| 24 |                    |                      |                                                                |     |
| 25 |                    |                      |                                                                |     |
| 26 |                    |                      |                                                                |     |
| 27 |                    |                      |                                                                |     |
| 28 | Confidentiality    | <a href="#">#27</a>  | How personal information about potential and enrolled          | 11  |
| 29 |                    |                      | participants will be collected, shared, and maintained in      |     |
| 30 |                    |                      | order to protect confidentiality before, during, and after     |     |
| 31 |                    |                      | the trial                                                      |     |
| 32 |                    |                      |                                                                |     |
| 33 |                    |                      |                                                                |     |
| 34 |                    |                      |                                                                |     |
| 35 |                    |                      |                                                                |     |
| 36 |                    |                      |                                                                |     |
| 37 |                    |                      |                                                                |     |
| 38 | Declaration of     | <a href="#">#28</a>  | Financial and other competing interests for principal          | 15  |
| 39 | interests          |                      | investigators for the overall trial and each study site        |     |
| 40 |                    |                      |                                                                |     |
| 41 |                    |                      |                                                                |     |
| 42 |                    |                      |                                                                |     |
| 43 |                    |                      |                                                                |     |
| 44 | Data access        | <a href="#">#29</a>  | Statement of who will have access to the final trial           | 11  |
| 45 |                    |                      | dataset, and disclosure of contractual agreements that         |     |
| 46 |                    |                      | limit such access for investigators                            |     |
| 47 |                    |                      |                                                                |     |
| 48 |                    |                      |                                                                |     |
| 49 |                    |                      |                                                                |     |
| 50 |                    |                      |                                                                |     |
| 51 | Ancillary and post | <a href="#">#30</a>  | Provisions, if any, for ancillary and post-trial care, and for | n/a |
| 52 | trial care         |                      | compensation to those who suffer harm from trial               |     |
| 53 |                    |                      | participation                                                  |     |
| 54 |                    |                      |                                                                |     |
| 55 |                    |                      |                                                                |     |
| 56 |                    |                      |                                                                |     |
| 57 |                    |                      |                                                                |     |
| 58 |                    |                      |                                                                |     |
| 59 |                    |                      |                                                                |     |
| 60 |                    |                      |                                                                |     |

1 Dissemination policy: [#31a](#) Plans for investigators and sponsor to communicate trial 12  
 2 trial results results to participants, healthcare professionals, the  
 3 public, and other relevant groups (eg, via publication,  
 4 reporting in results databases, or other data sharing  
 5 arrangements), including any publication restrictions  
 6  
 7  
 8  
 9  
 10  
 11  
 12

13 Dissemination policy: [#31b](#) Authorship eligibility guidelines and any intended use of n/a  
 14 authorship professional writers  
 15  
 16  
 17

18 Dissemination policy: [#31c](#) Plans, if any, for granting public access to the full n/a  
 19 reproducible protocol, participant-level dataset, and statistical code  
 20 research  
 21  
 22  
 23  
 24  
 25

## 26 Appendices

27  
 28  
 29 Informed consent [#32](#) Model consent form and other related documentation See  
 30 materials given to participants and authorised surrogates uploaded  
 31 document  
 32  
 33  
 34  
 35

36 Biological specimens [#33](#) Plans for collection, laboratory evaluation, and storage of n/a  
 37 biological specimens for genetic or molecular analysis in  
 38 the current trial and for future use in ancillary studies, if  
 39 applicable  
 40  
 41  
 42  
 43  
 44  
 45

46 None The SPIRIT checklist is distributed under the terms of the Creative Commons Attribution  
 47 License CC-BY-ND 3.0. This checklist can be completed online using <https://www.goodreports.org/>, a  
 48 tool made by the [EQUATOR Network](#) in collaboration with [Penelope.ai](#)  
 49  
 50  
 51  
 52  
 53  
 54  
 55  
 56  
 57  
 58  
 59  
 60
